# Supplementary material for: Exploring the relationship between cocrystal stability and symmetry: is Wallach's rule applicable to multi-component solids?
Source: Royal Society of Chemistry journal article supplement (doi:10.1039/b717532a), 2008-01-01
Supplement: b717532a.pdf [file b717532a.pdf]

# Supplementary Material

## Exploring the relationship between cocrystal stability and symmetry: is Wallach's rule applicable to multi-component solids?

T. Frišćić, L. Fábán, J. C. Burley, D. G. Reid, M. J. Duer and W. Jones

|                   |                                                                                                                   |    |
|-------------------|-------------------------------------------------------------------------------------------------------------------|----|
| <b>Figure S1</b>  | PXRD pattern for the cocrystal of (caf)(D-ma)                                                                     | 3  |
| <b>Figure S2</b>  | PXRD pattern for the cocrystal of (caf)(DL-ma)                                                                    | 3  |
| <b>Figure S3</b>  | PXRD pattern for the cocrystal of (tp) <sub>2</sub> (D-ta)                                                        | 4  |
| <b>Figure S4</b>  | PXRD pattern for the cocrystal of (tp) <sub>2</sub> (DL-ta)                                                       | 4  |
| <b>Figure S5</b>  | PXRD pattern for the cocrystal of (tp)(D-ma)                                                                      | 5  |
| <b>Figure S6</b>  | PXRD pattern for the cocrystal of (tp)(DL-ma)                                                                     | 5  |
| <b>Figure S7</b>  | PXRD pattern for the cocrystal of (tp)(D-ma) collected using CoK <sub>α</sub> radiation                           | 6  |
| <b>Figure S8</b>  | PXRD pattern for the cocrystal of (tp)(DL-ma) collected using CoK <sub>α</sub> radiation.                         | 6  |
| <b>Figure S9</b>  | PXRD pattern for the cocrystal of (tp)(DL-ma) collected using CoK <sub>α</sub> radiation, with marked impurities. | 7  |
| <b>Figure S10</b> | <sup>15</sup> N CP-MAS spectra for the cocrystals (caf)(D-ma) and (caf)(DL-ma)                                    | 7  |
| <b>Figure S11</b> | <sup>15</sup> N CP-MAS spectra for the cocrystals (tp) <sub>2</sub> (D-ta) and (tp) <sub>2</sub> (DL-ta)          | 8  |
| <b>Figure S12</b> | <sup>15</sup> N CP-MAS spectra for the cocrystals (tp)(D-ma) and (tp)(DL-ma)                                      | 8  |
| <b>Figure S13</b> | <sup>13</sup> C CP-MAS spectra for the cocrystals (tp)(D-ma) and (tp)(DL-ma)                                      | 9  |
| <b>Figure S14</b> | PXRD patterns for the cocrystal of (caf)(D-ma) after exposure to 43% relative humidity                            | 10 |

|                   |                                                                                                      |    |
|-------------------|------------------------------------------------------------------------------------------------------|----|
| <b>Figure S15</b> | PXRD pattern for the cocrystal of (caf)(D-ma) after exposure to 75% relative humidity                | 11 |
| <b>Figure S16</b> | PXRD pattern for the cocrystal of (caf)(D-ma) after exposure to 98% relative humidity                | 12 |
| <b>Figure S17</b> | PXRD patterns for the cocrystal of (caf)(DL-ma) after exposure to 43% relative humidity              | 13 |
| <b>Figure S18</b> | PXRD pattern for the cocrystal of (caf)(DL-ma) after exposure to 75% relative humidity               | 14 |
| <b>Figure S19</b> | PXRD pattern for the cocrystal of (caf)(DL-ma) after exposure to 98% relative humidity               | 15 |
| <b>Figure S20</b> | PXRD patterns for the cocrystal of (tp) <sub>2</sub> (D-ta) after exposure to 43% relative humidity  | 16 |
| <b>Figure S21</b> | PXRD pattern for the cocrystal of (tp) <sub>2</sub> (D-ta) after exposure to 75% relative humidity   | 17 |
| <b>Figure S22</b> | PXRD pattern for the cocrystal of (tp) <sub>2</sub> (D-ta) after exposure to 98% relative humidity   | 18 |
| <b>Figure S23</b> | PXRD patterns for the cocrystal of (tp) <sub>2</sub> (DL-ta) after exposure to 43% relative humidity | 19 |
| <b>Figure S24</b> | PXRD pattern for the cocrystal of (tp) <sub>2</sub> (DL-ta) after exposure to 75% relative humidity  | 20 |
| <b>Figure S25</b> | PXRD pattern for the cocrystal of (tp) <sub>2</sub> (DL-ta) after exposure to 98% relative humidity  | 21 |
| <b>Figure S26</b> | PXRD patterns for the cocrystal of (tp)(D-ma) after exposure to 43% relative humidity                | 22 |
| <b>Figure S27</b> | PXRD pattern for the cocrystal of (tp)(D-ma) after exposure to 75% relative humidity                 | 23 |
| <b>Figure S28</b> | PXRD pattern for the cocrystal of (tp)(D-ma) after exposure to 98% relative humidity                 | 24 |
| <b>Figure S29</b> | PXRD patterns for the cocrystal of (tp)(DL-ma) after exposure to 43% relative humidity               | 25 |
| <b>Figure S30</b> | PXRD pattern for the cocrystal of (tp)(DL-ma) after exposure to 75% relative humidity                | 26 |
| <b>Figure S31</b> | PXRD pattern for the cocrystal of (tp)(DL-ma) after exposure to 98% relative humidity                | 27 |
| <b>Figure S32</b> | DSC thermogram for the (tp)(D-ma) cocrystal.                                                         | 28 |
| <b>Figure S33</b> | DSC thermogram for the (tp)(DL-ma) cocrystal.                                                        | 28 |
| <b>Figure S34</b> | DSC thermogram for the (tp) <sub>2</sub> (D-ta) cocrystal.                                           | 29 |
| <b>Figure S35</b> | DSC thermogram for the (tp) <sub>2</sub> (DL-ta) cocrystal.                                          | 29 |

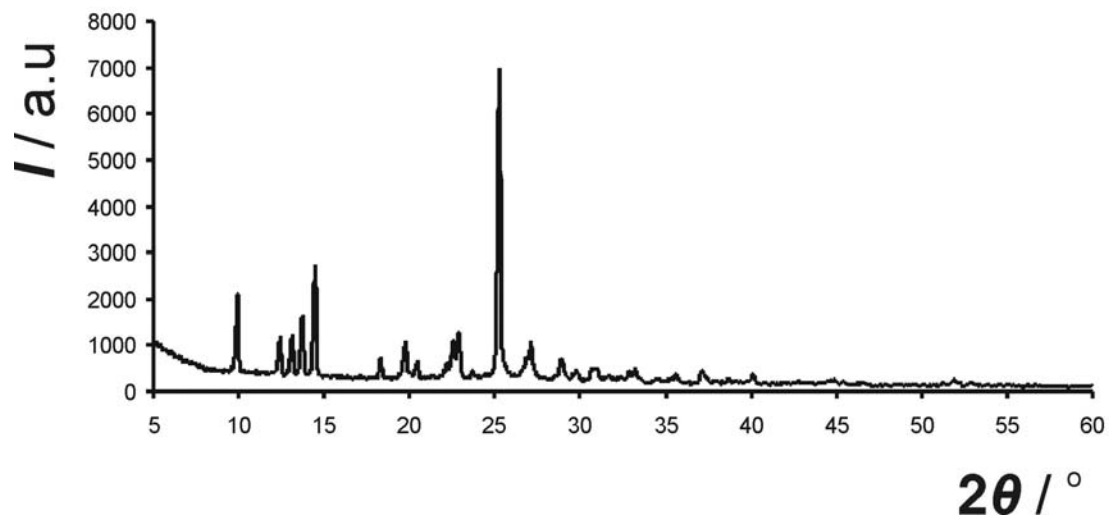

**Figure S1.** PXRD pattern for the cocrystal of (caf):(D-ma)

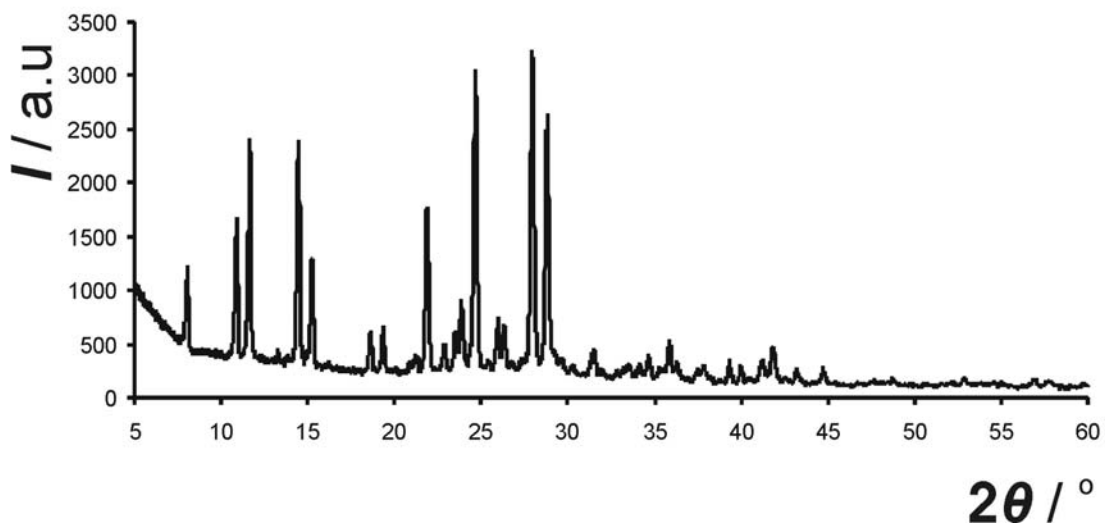

**Figure S2.** PXRD pattern for the cocrystal of (caf):(DL-ma)

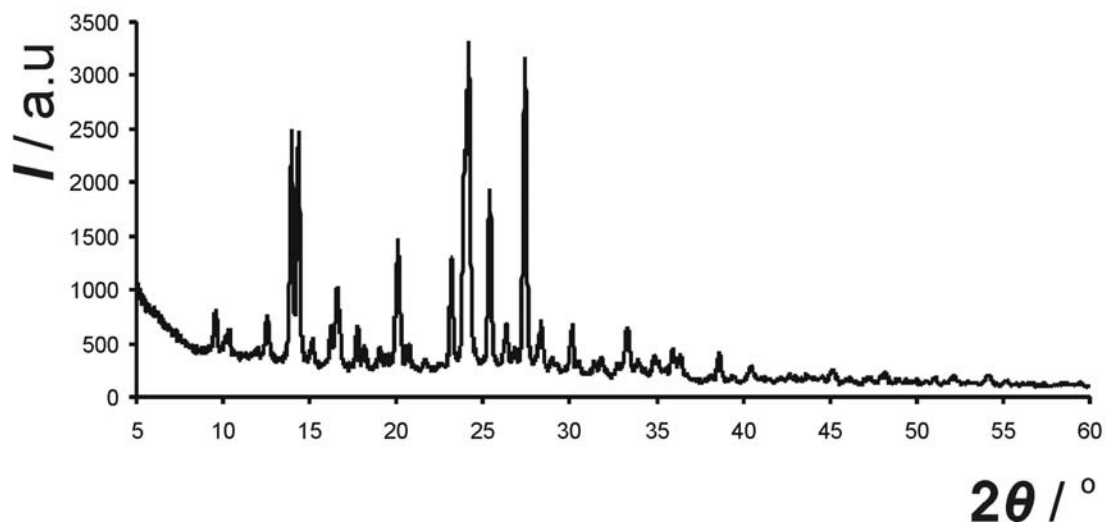

**Figure S3.** PXRD pattern for the cocrystal of (tp)(D-ta)

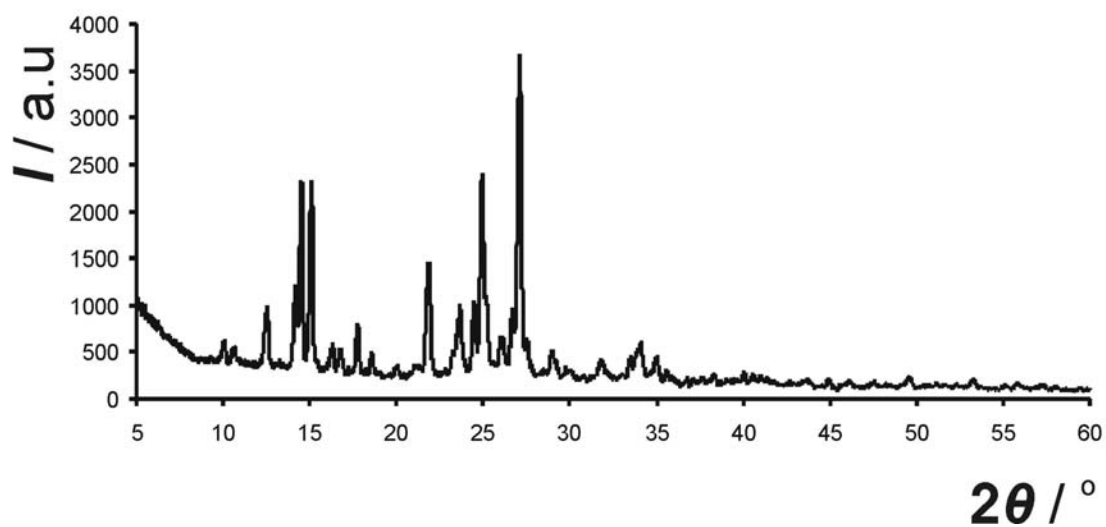

**Figure S4.** PXRD pattern for the cocrystal of (tp)(DL-ta)

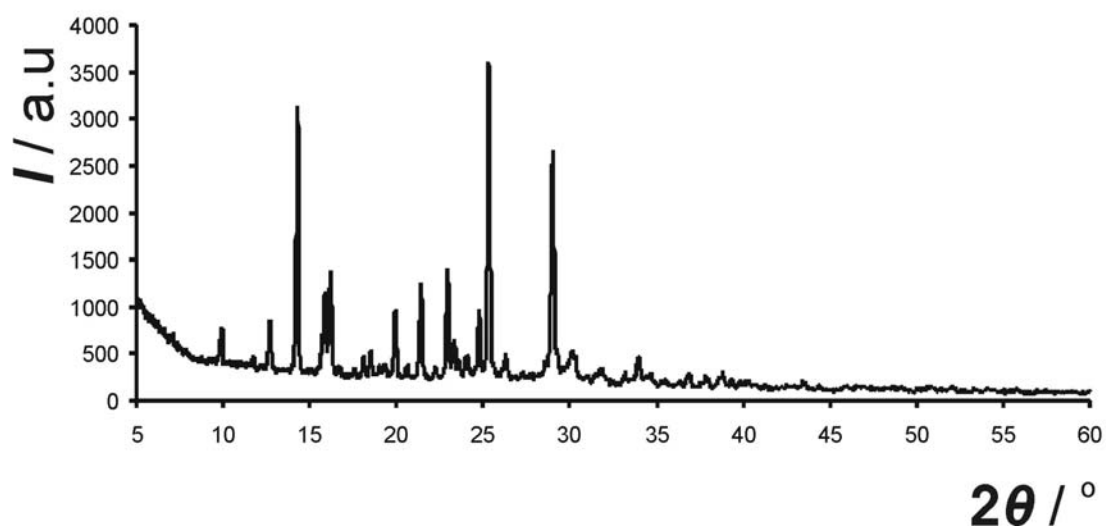

**Figure S5.** PXRD pattern for the cocrystal of (tp):(D-ma)

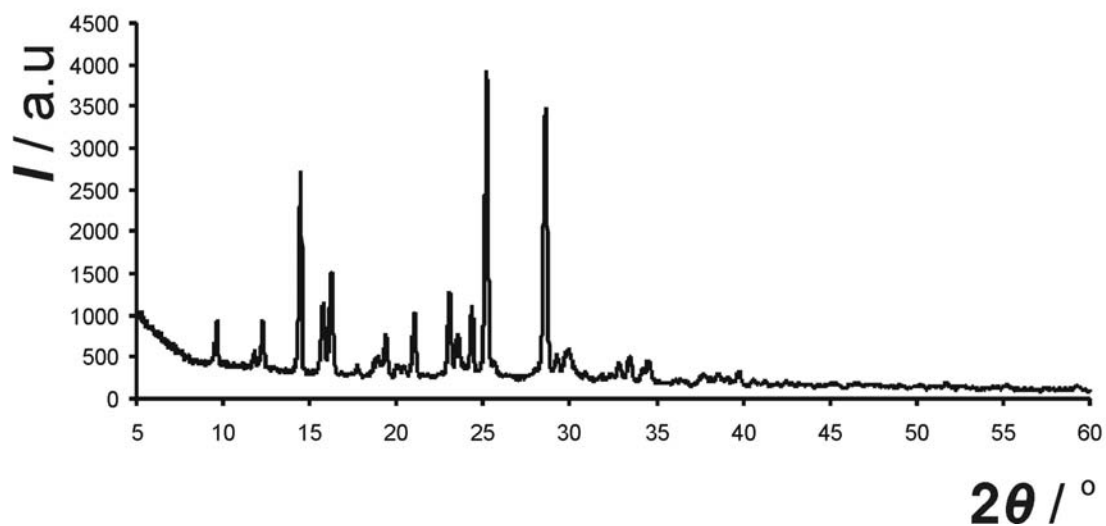

**Figure S6.** PXRD pattern for the cocrystal of (tp):(DL-ma)

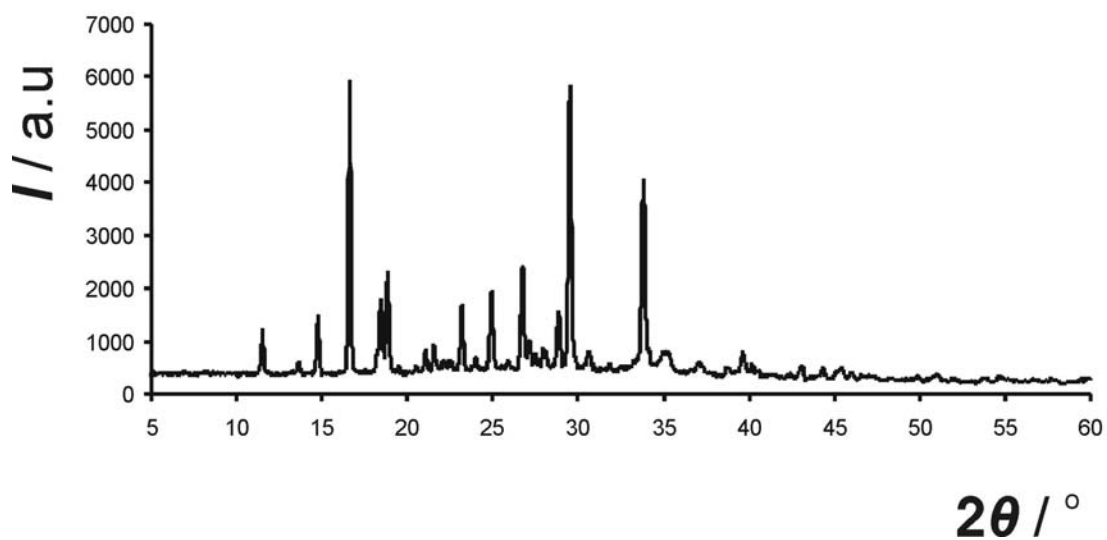

**Figure S7.** PXRD pattern for the cocrystal of **(tp):(D-ma)** collected using  $\text{CoK}_\alpha$  radiation.

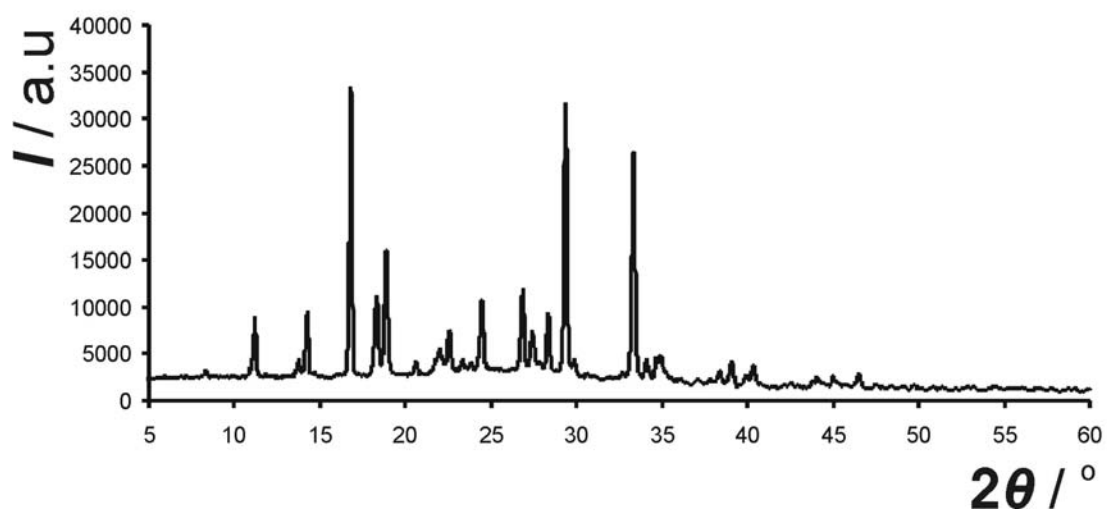

**Figure S8.** PXRD pattern for the cocrystal of **(tp):(DL-ma)** collected using  $\text{CoK}_\alpha$  radiation.

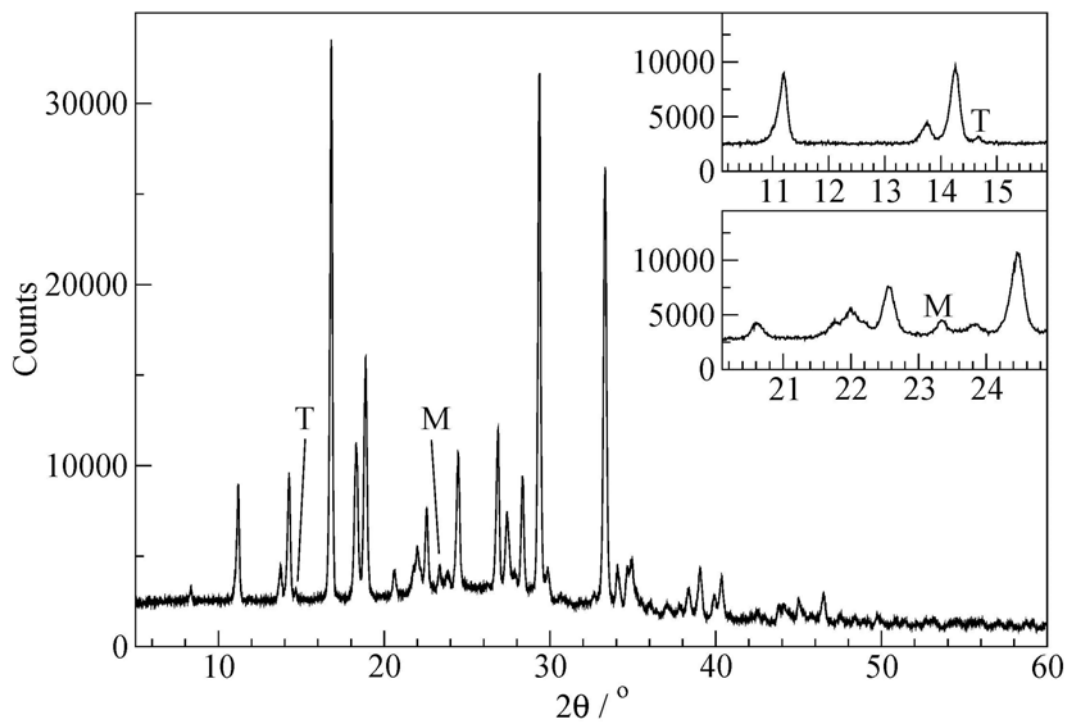

**Figure S9.** PXR D pattern for the cocrystal of **(tp)(DL-ma)** collected using  $\text{CoK}\alpha$  radiation, with marked impurities of theophylline (T, 0.5 %) and DL-malic acid (M, 6.5 %).

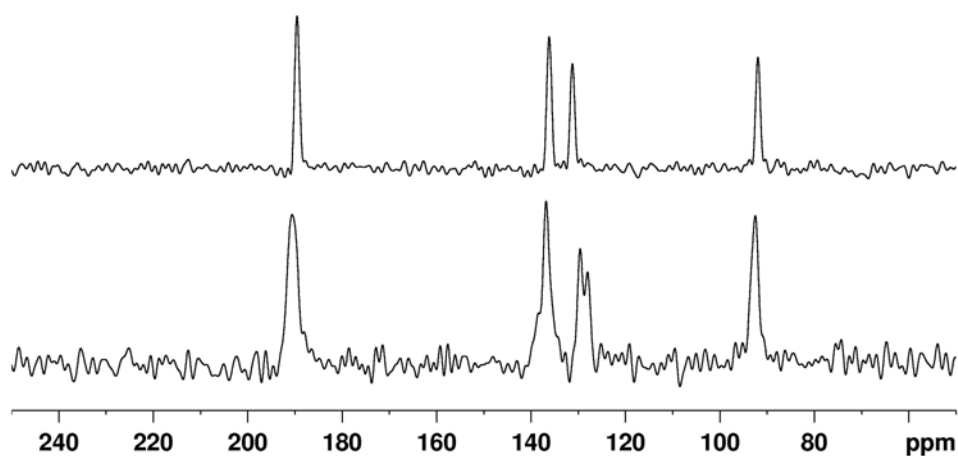

**Figure S10.**  $^{15}\text{N}$  CP-MAS spectra for the cocrystals **(caf)(D-ma)** (bottom) and **(caf)(DL-ma)** (top)

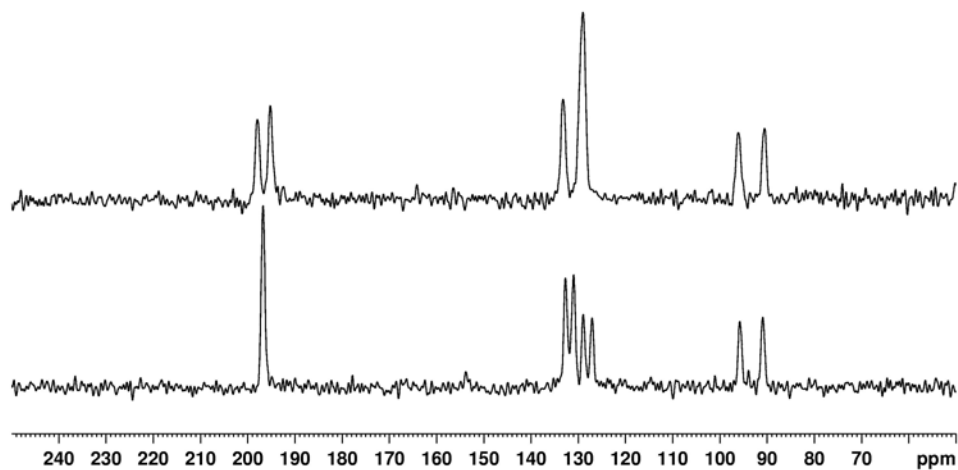

**Figure S11.**  $^{15}\text{N}$  CP-MAS spectra for the cocrystals (tp)(D-ta) (bottom) and (tp)(DL-ta) (top).

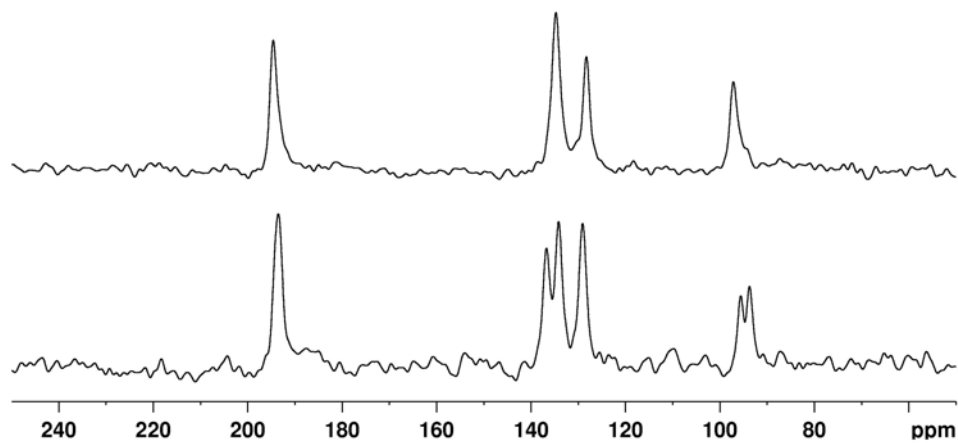

**Figure S12.**  $^{15}\text{N}$  CP-MAS spectra for the cocrystals (tp)(D-ma) (bottom) and (tp)(DL-ma) (top).



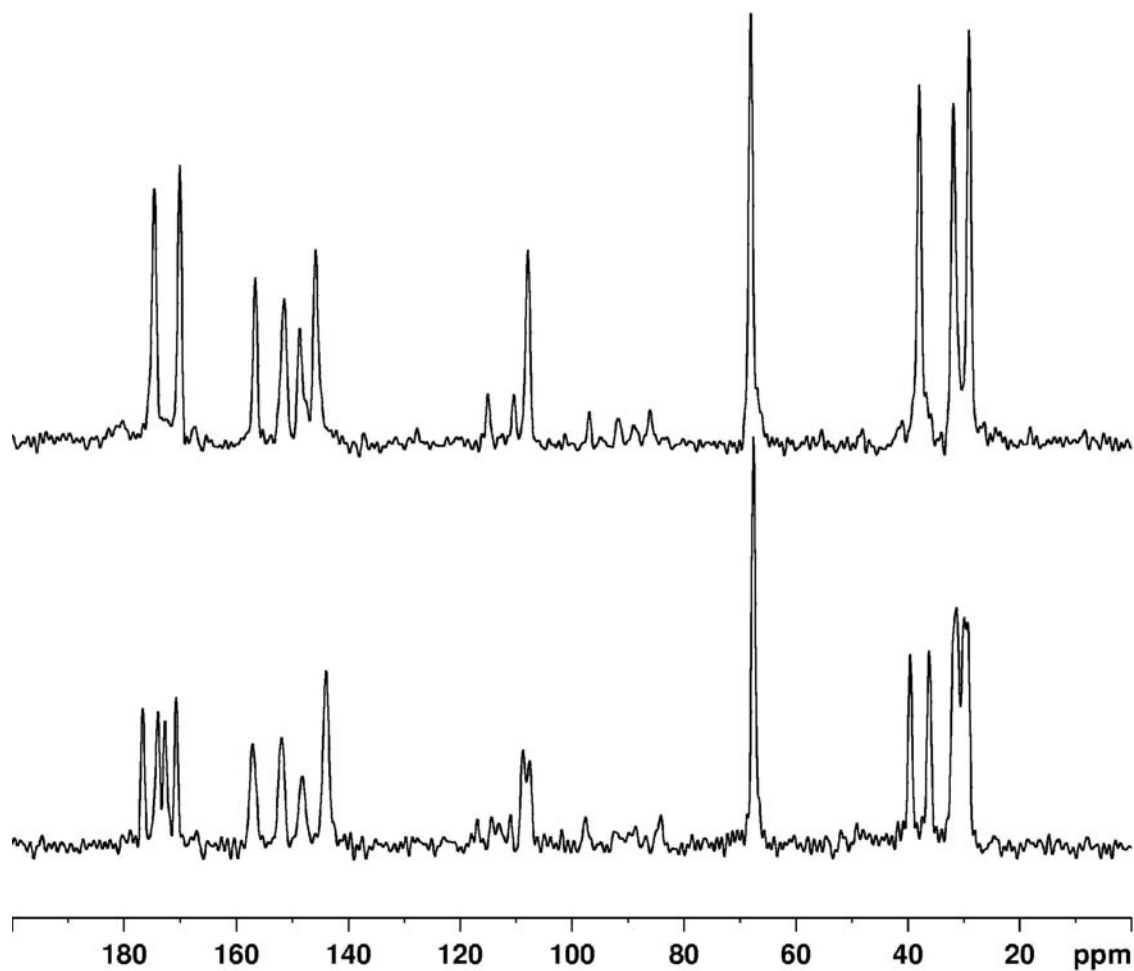

**Figure S13.**  $^{13}\text{C}$  CP-MAS spectra for the cocrystals (**tp**):(D-ma) (bottom) and (**tp**):(DL-ma) (top).

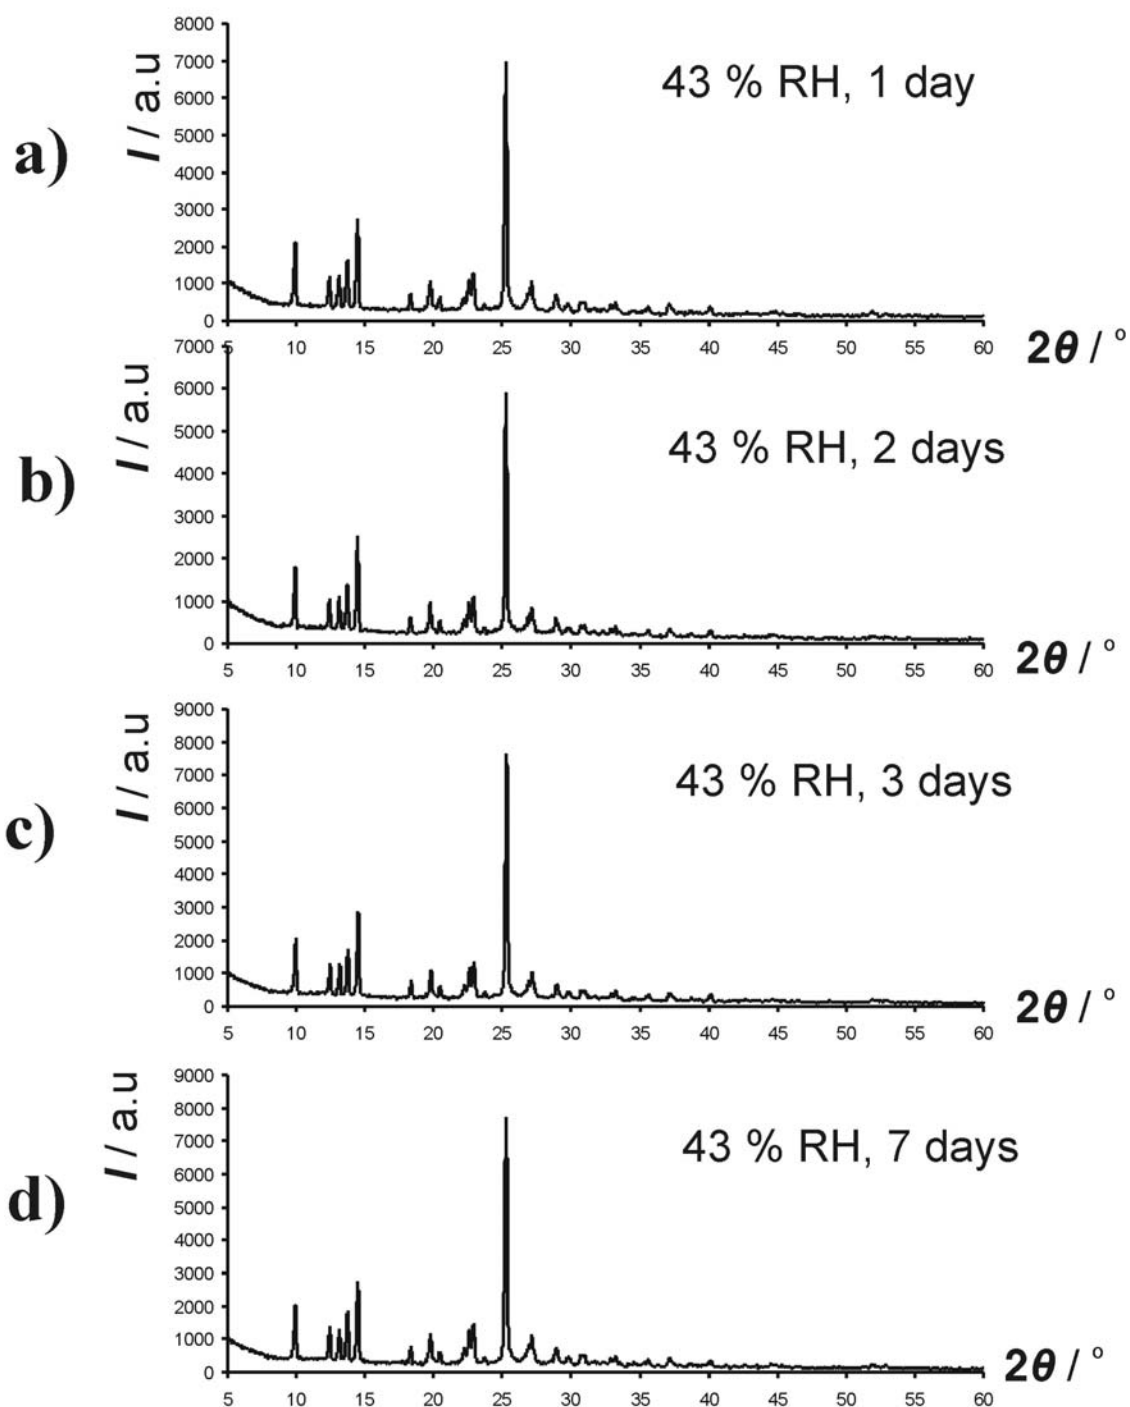

**Figure S14.** PXRD patterns for the cocrystal of (caf)(D-ma) after exposure to 43% relative humidity for: a) 1 day; b) 2 days; c) 3 days and d) 7 days.

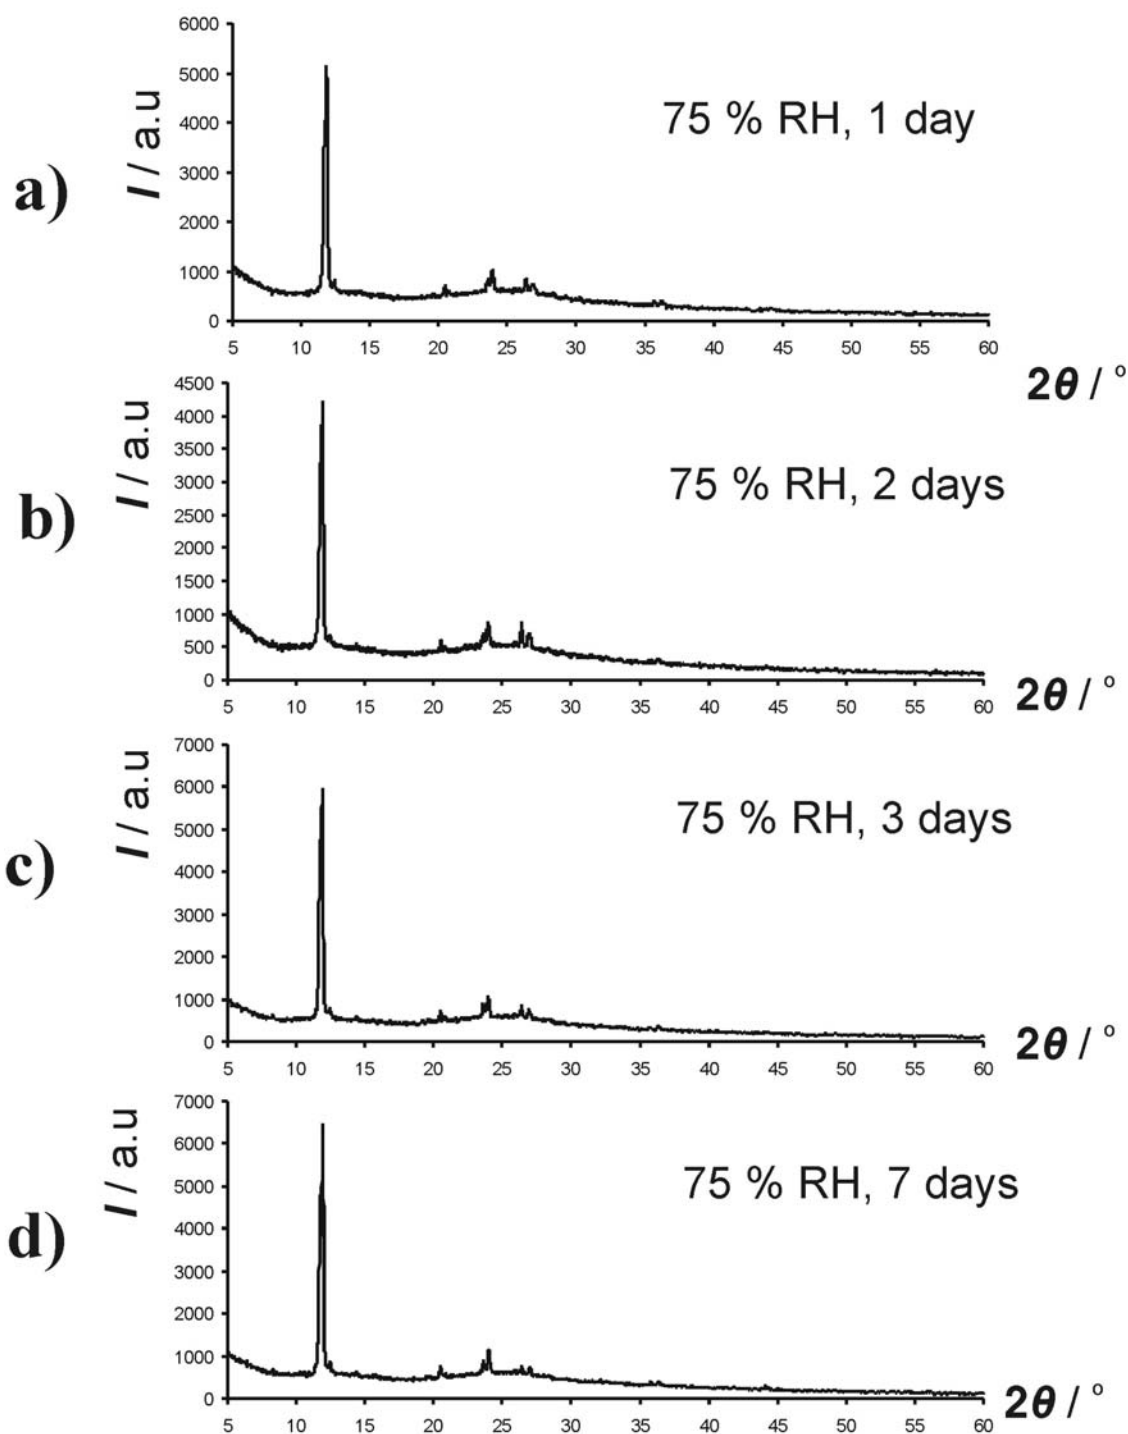

**Figure S15.** PXRD patterns for the cocrystal of (caf)(D-ma) after exposure to 75% relative humidity for: a) 1 day; b) 2 days; c) 3 days and d) 7 days.

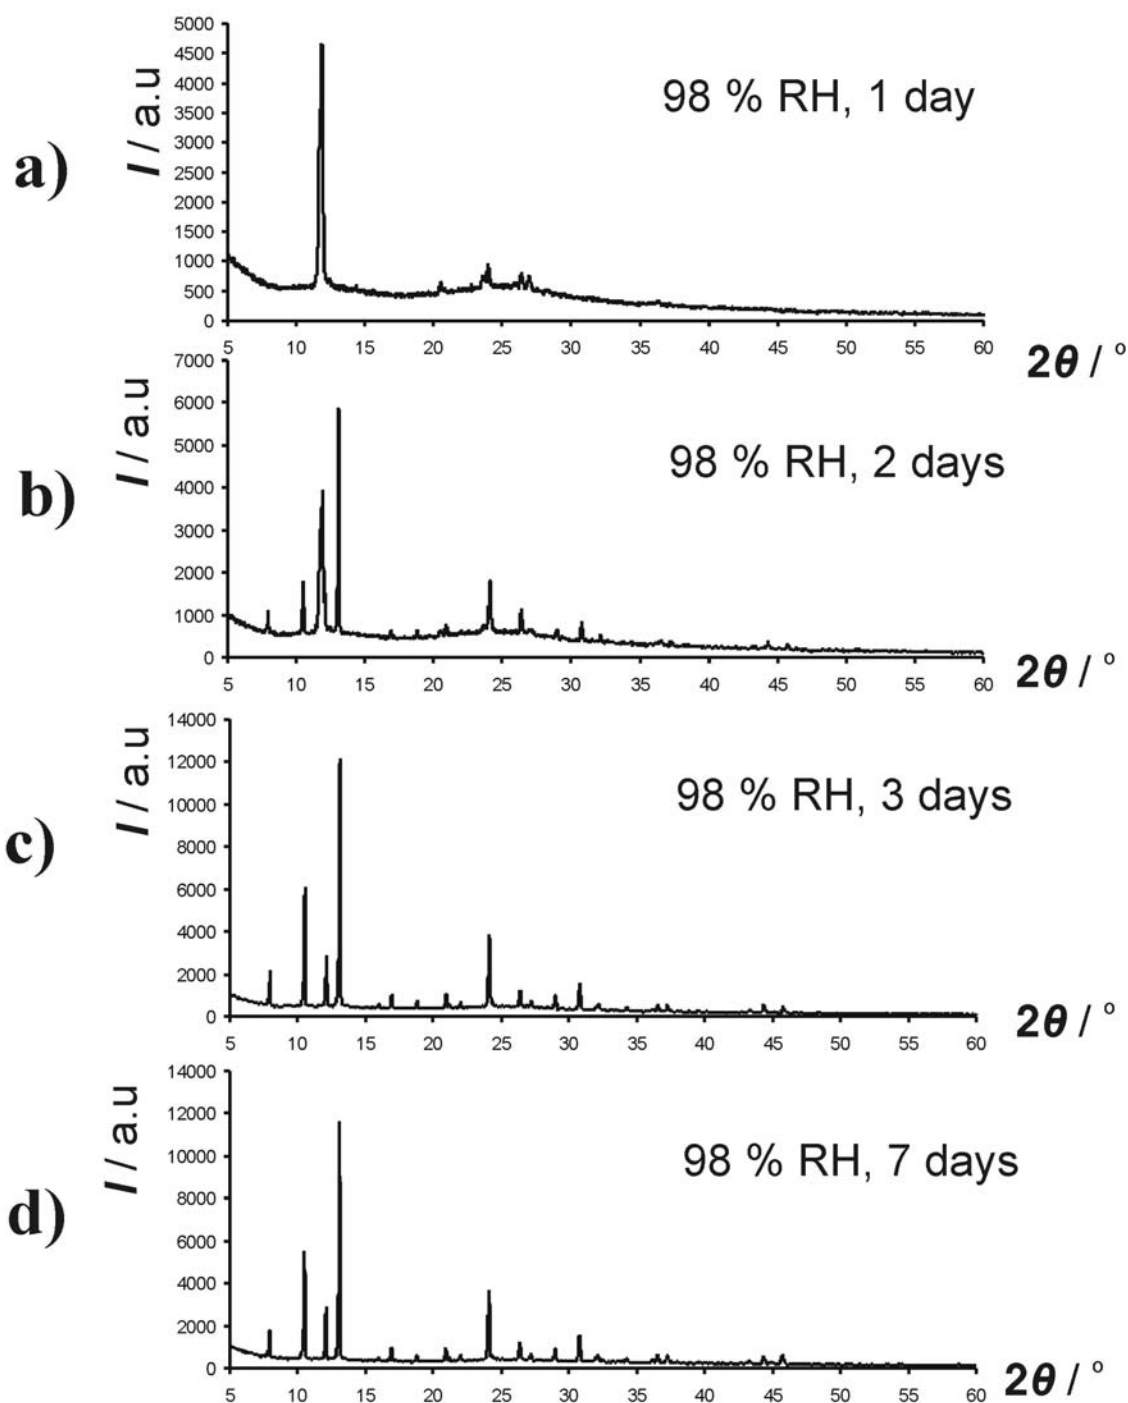

**Figure S16.** PXRD patterns for the cocrystal of (caf)(D-ma) after exposure to 98% relative humidity for: a) 1 day; b) 2 days; c) 3 days and d) 7 days.

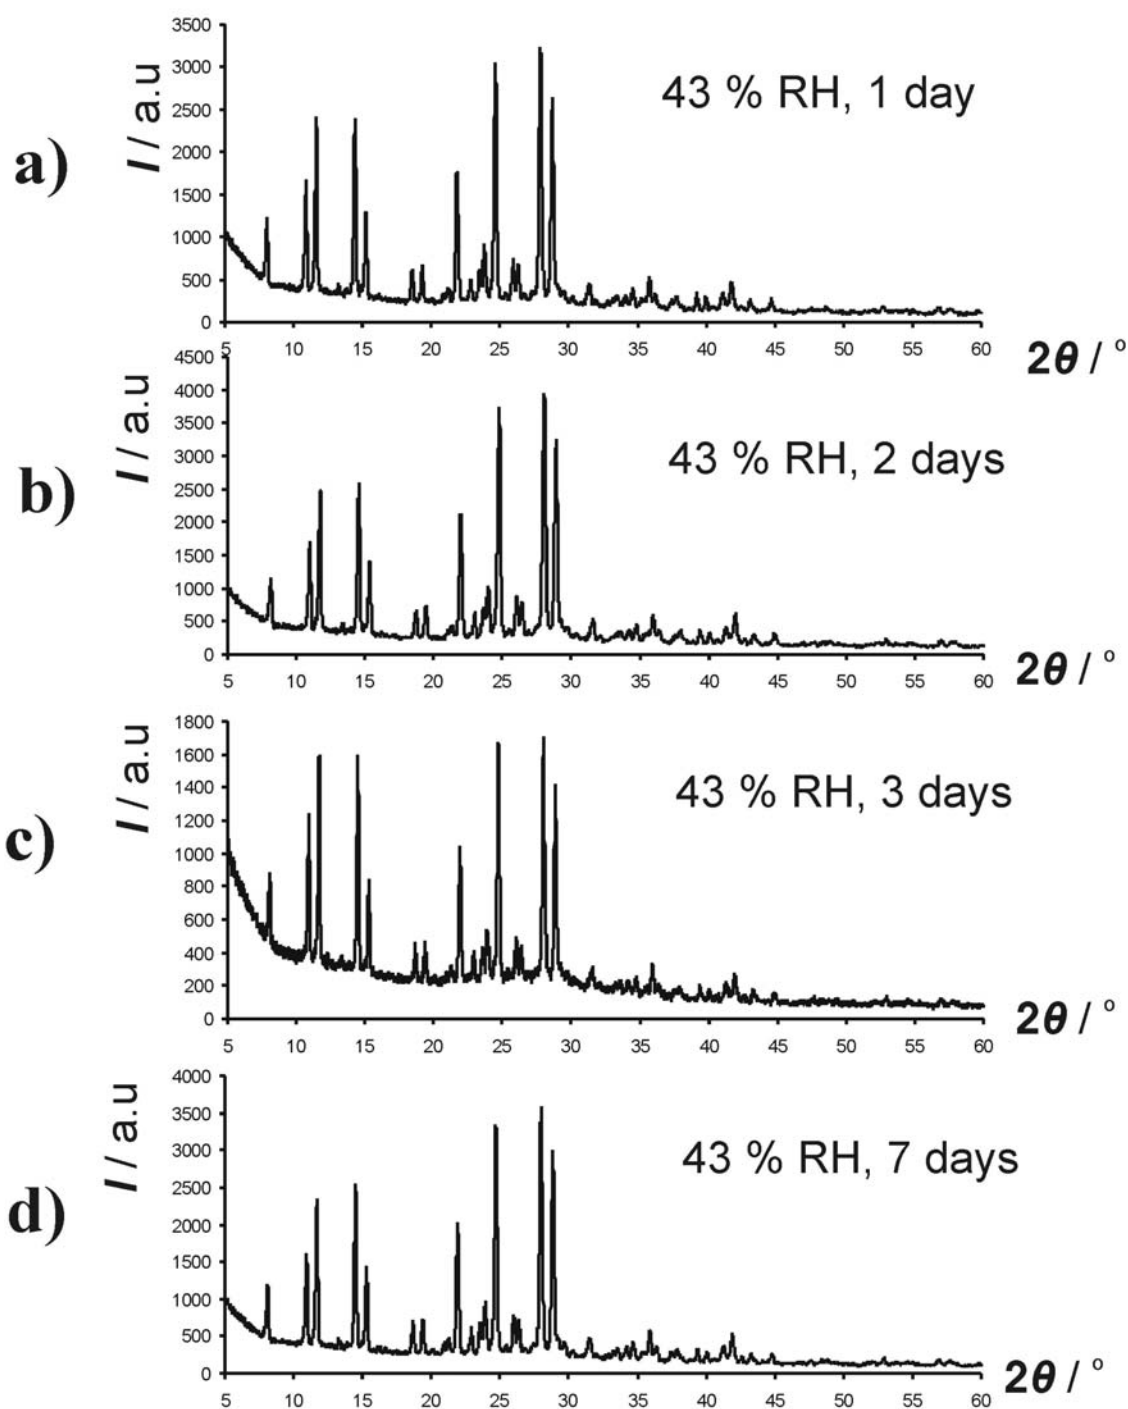

**Figure S17.** PXRD patterns for the cocrystal of (caf)(DL-ma) after exposure to 43% relative humidity for: a) 1 day; b) 2 days; c) 3 days and d) 7 days.

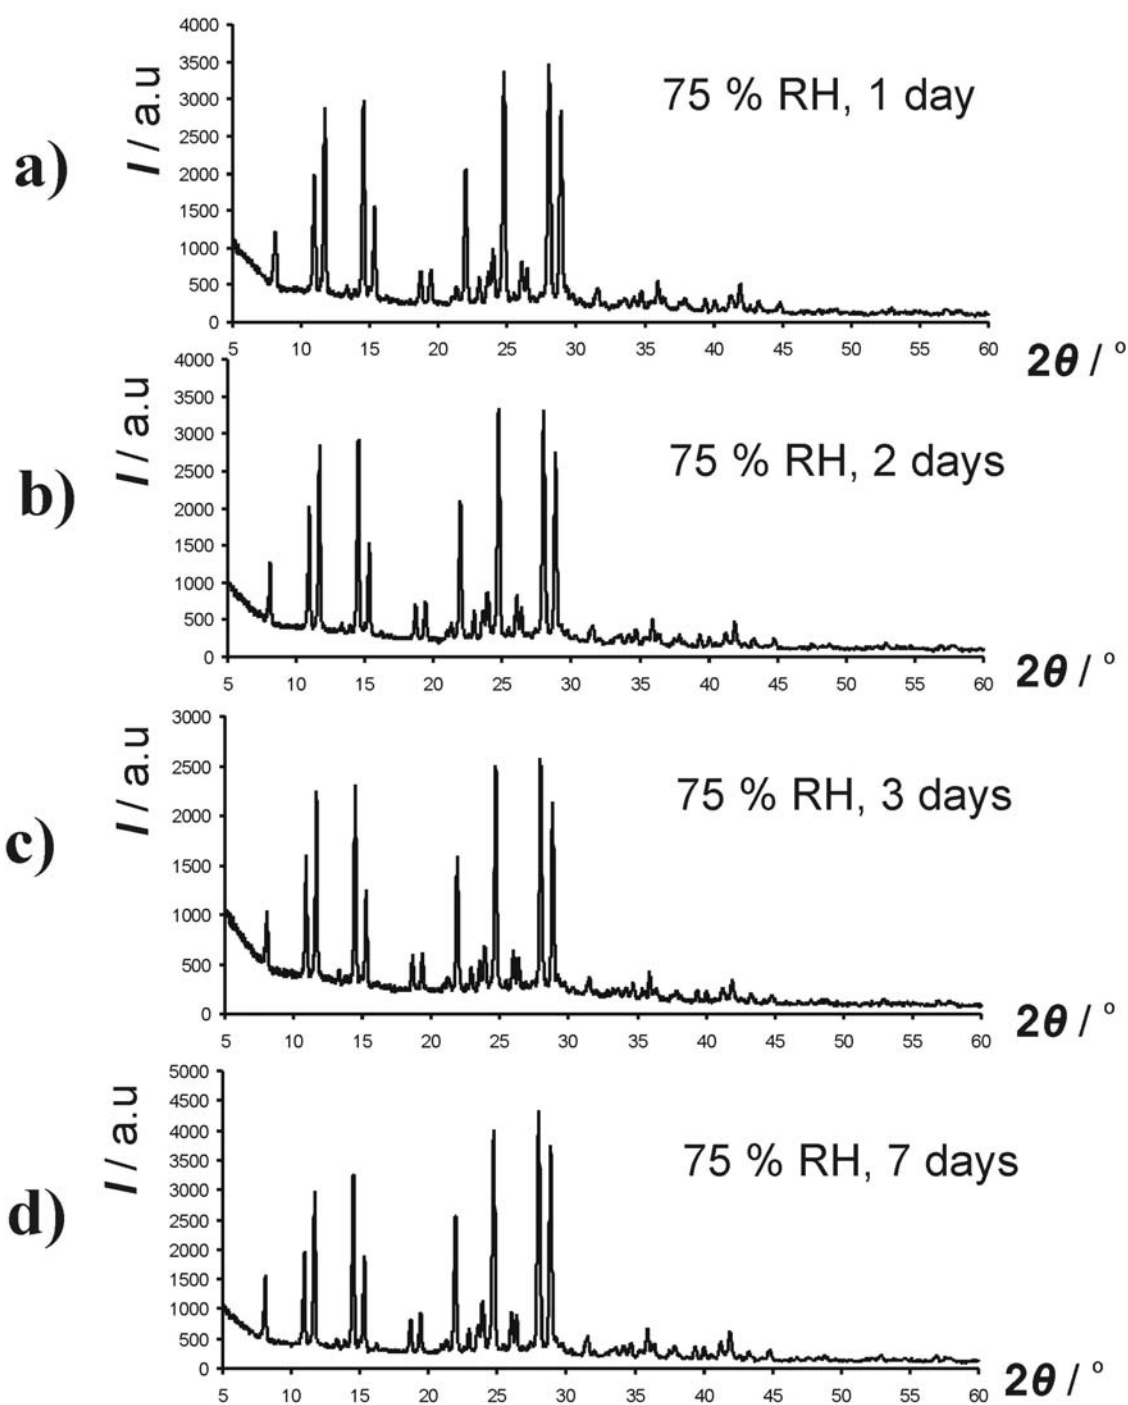

**Figure S18.** PXRD patterns for the cocrystal of (caf)(DL-ma) after exposure to 75% relative humidity for: a) 1 day; b) 2 days; c) 3 days and d) 7 days.

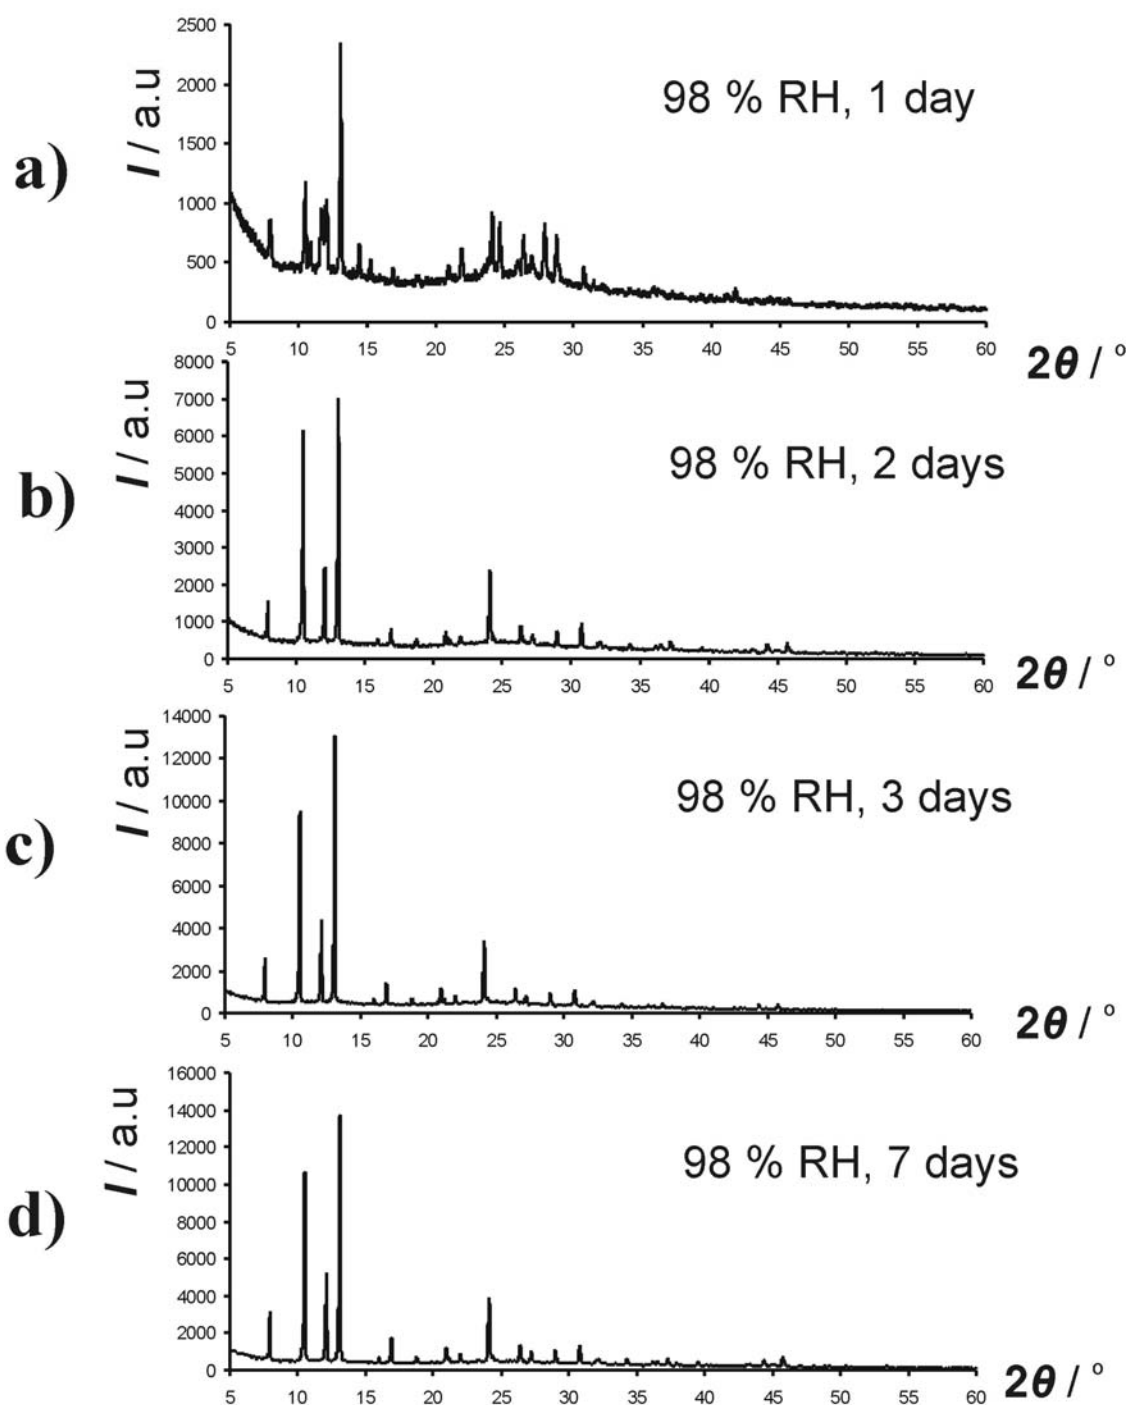

**Figure S19.** PXRD patterns for the cocrystal of (caf)(DL-ma) after exposure to 98% relative humidity for: a) 1 day; b) 2 days; c) 3 days and d) 7 days.

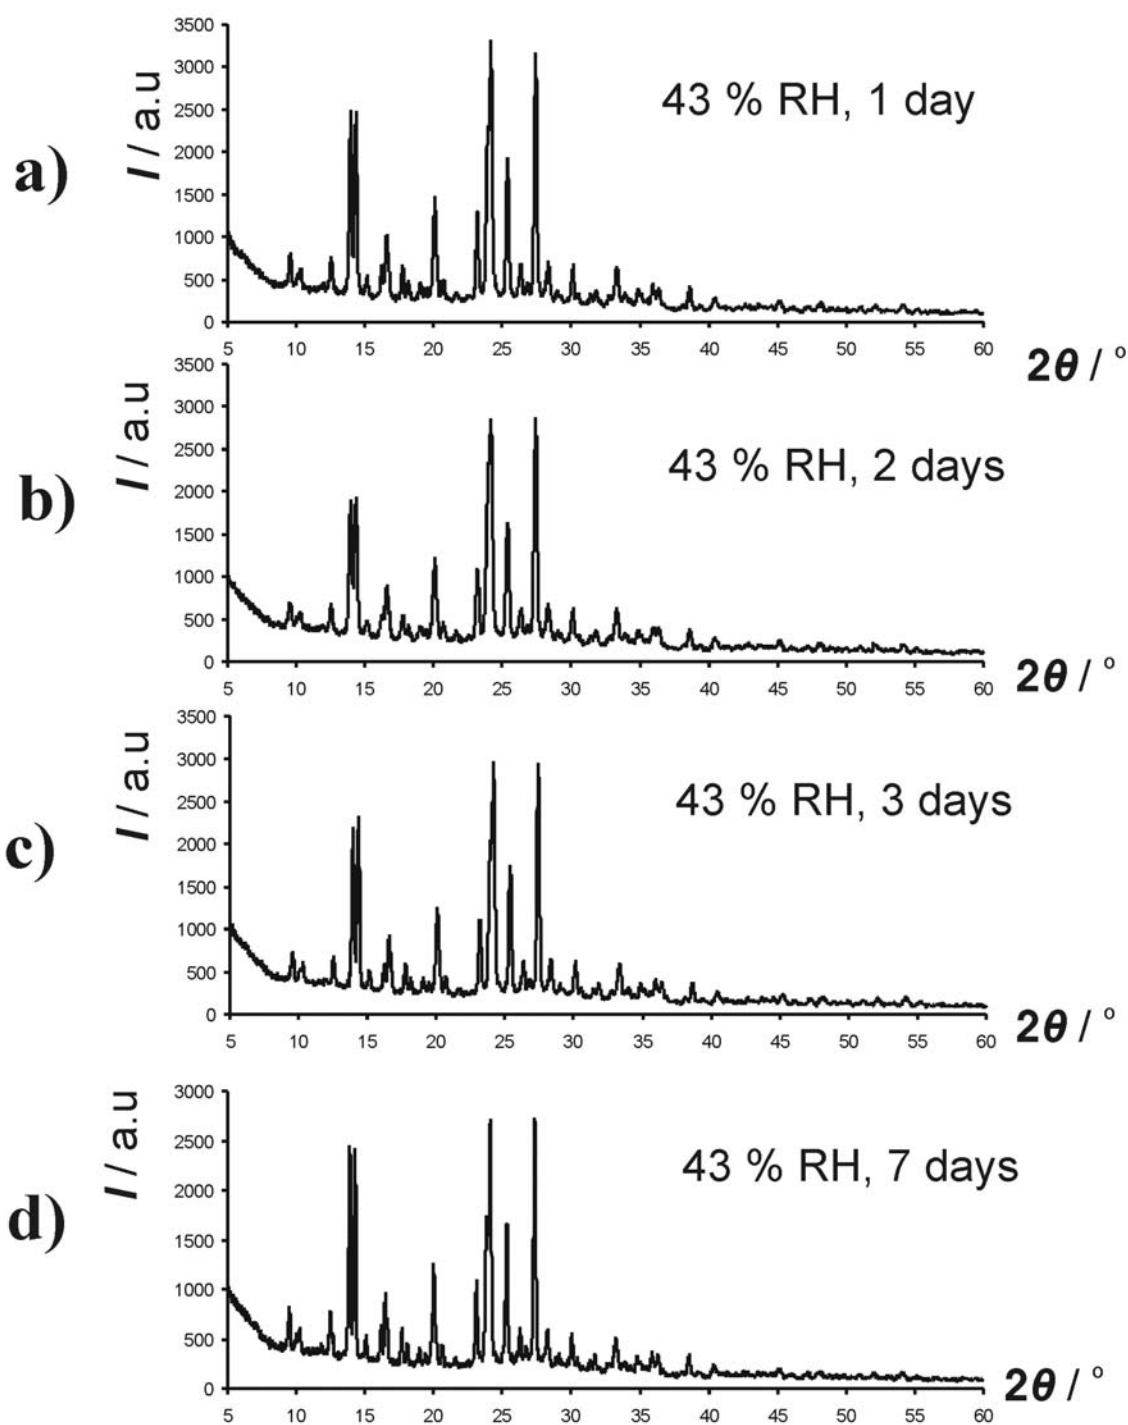

**Figure S20.** PXRD patterns for the cocrystal of  $(tp)_2(D-ta)$  after exposure to 43% relative humidity for: a) 1 day; b) 2 days; c) 3 days and d) 7 days.



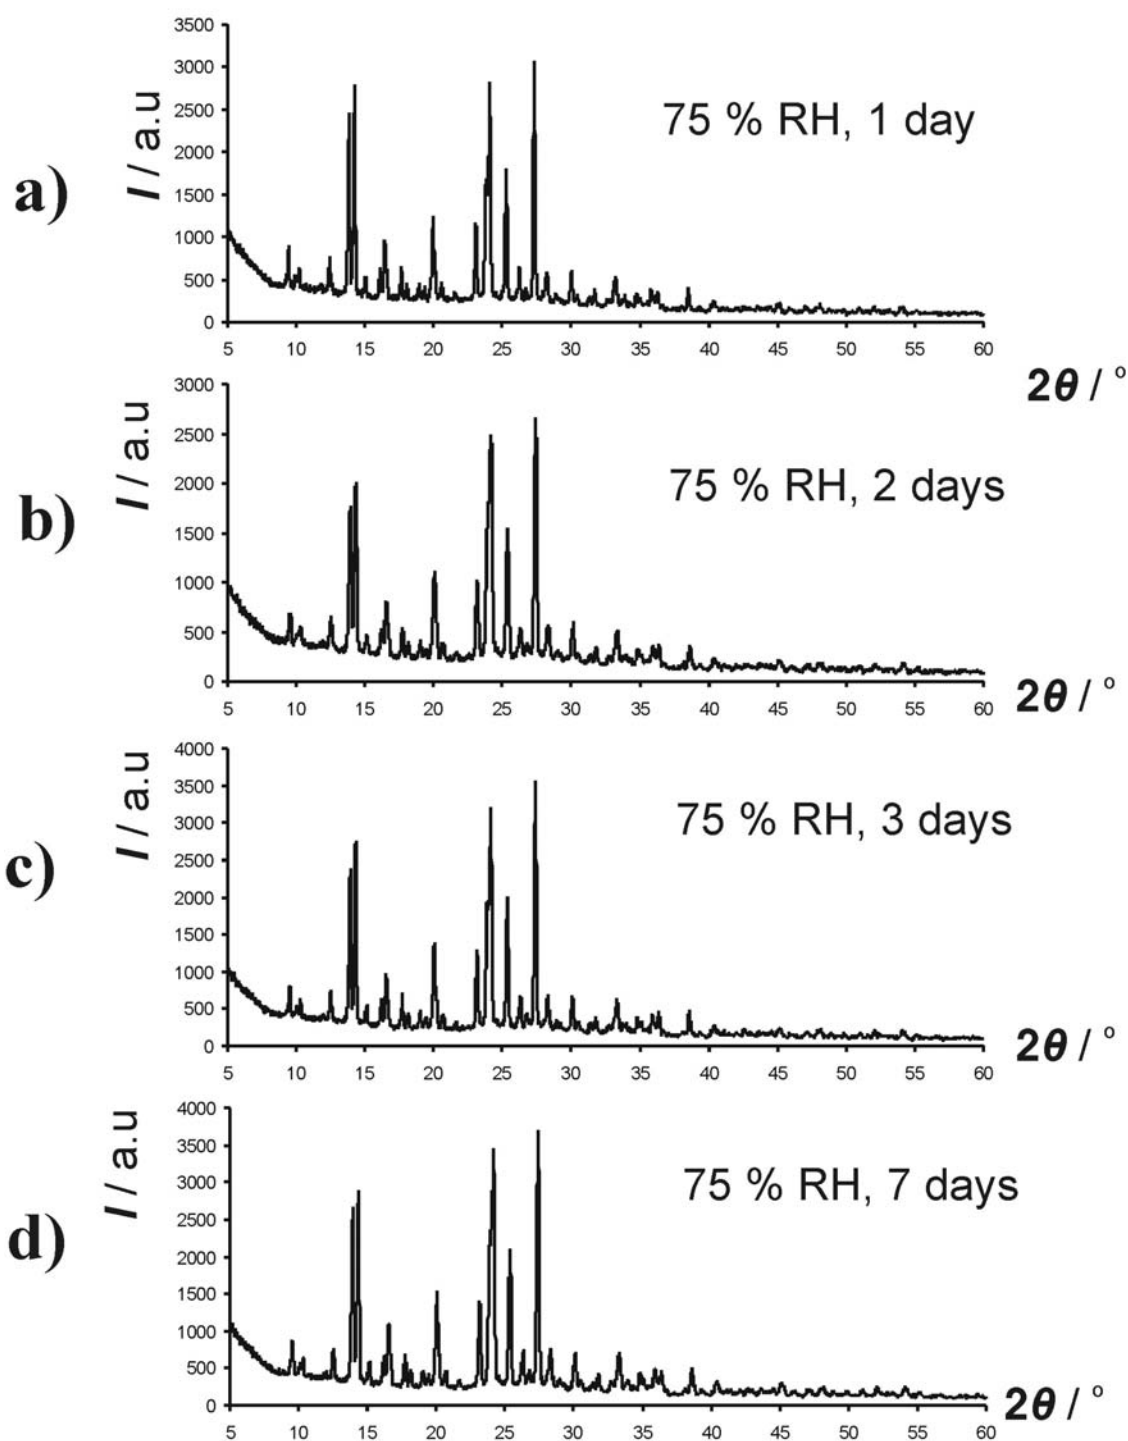

**Figure S21.** PXRD patterns for the cocrystal of  $(\text{tp})_2(\text{D-ta})$  after exposure to 75% relative humidity for: a) 1 day; b) 2 days; c) 3 days and d) 7 days.

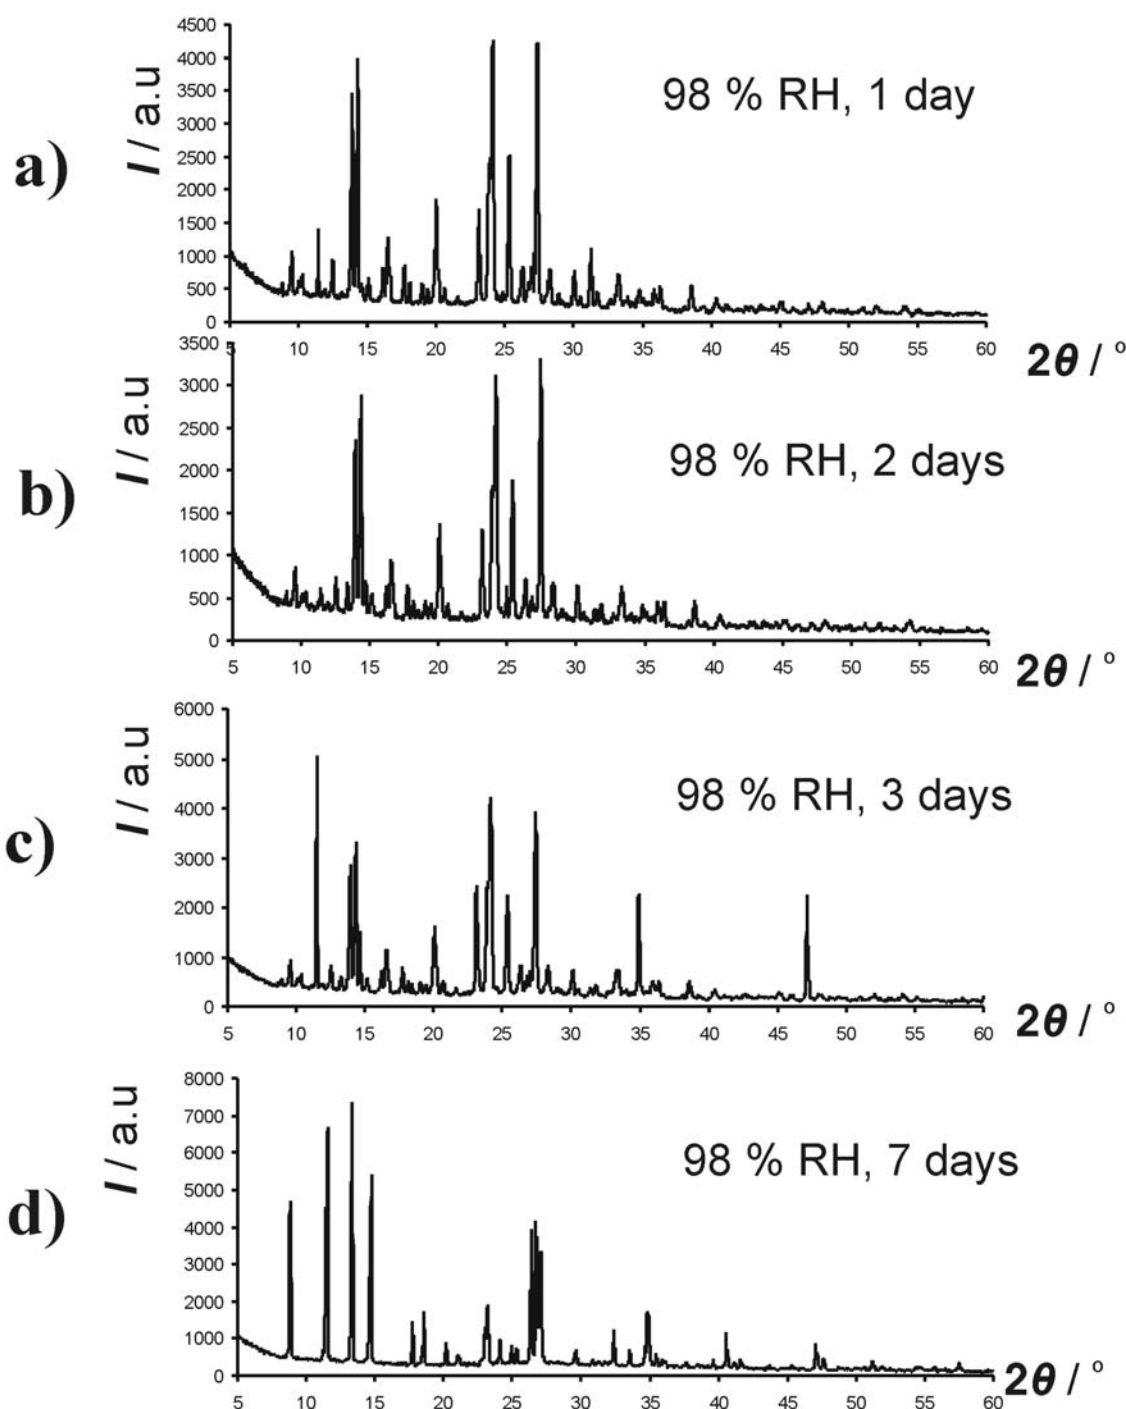

**Figure S22.** PXRD patterns for the cocrystal of  $(\text{tp})_2(\text{D-ta})$  after exposure to 98% relative humidity for: a) 1 day; b) 2 days; c) 3 days and d) 7 days.

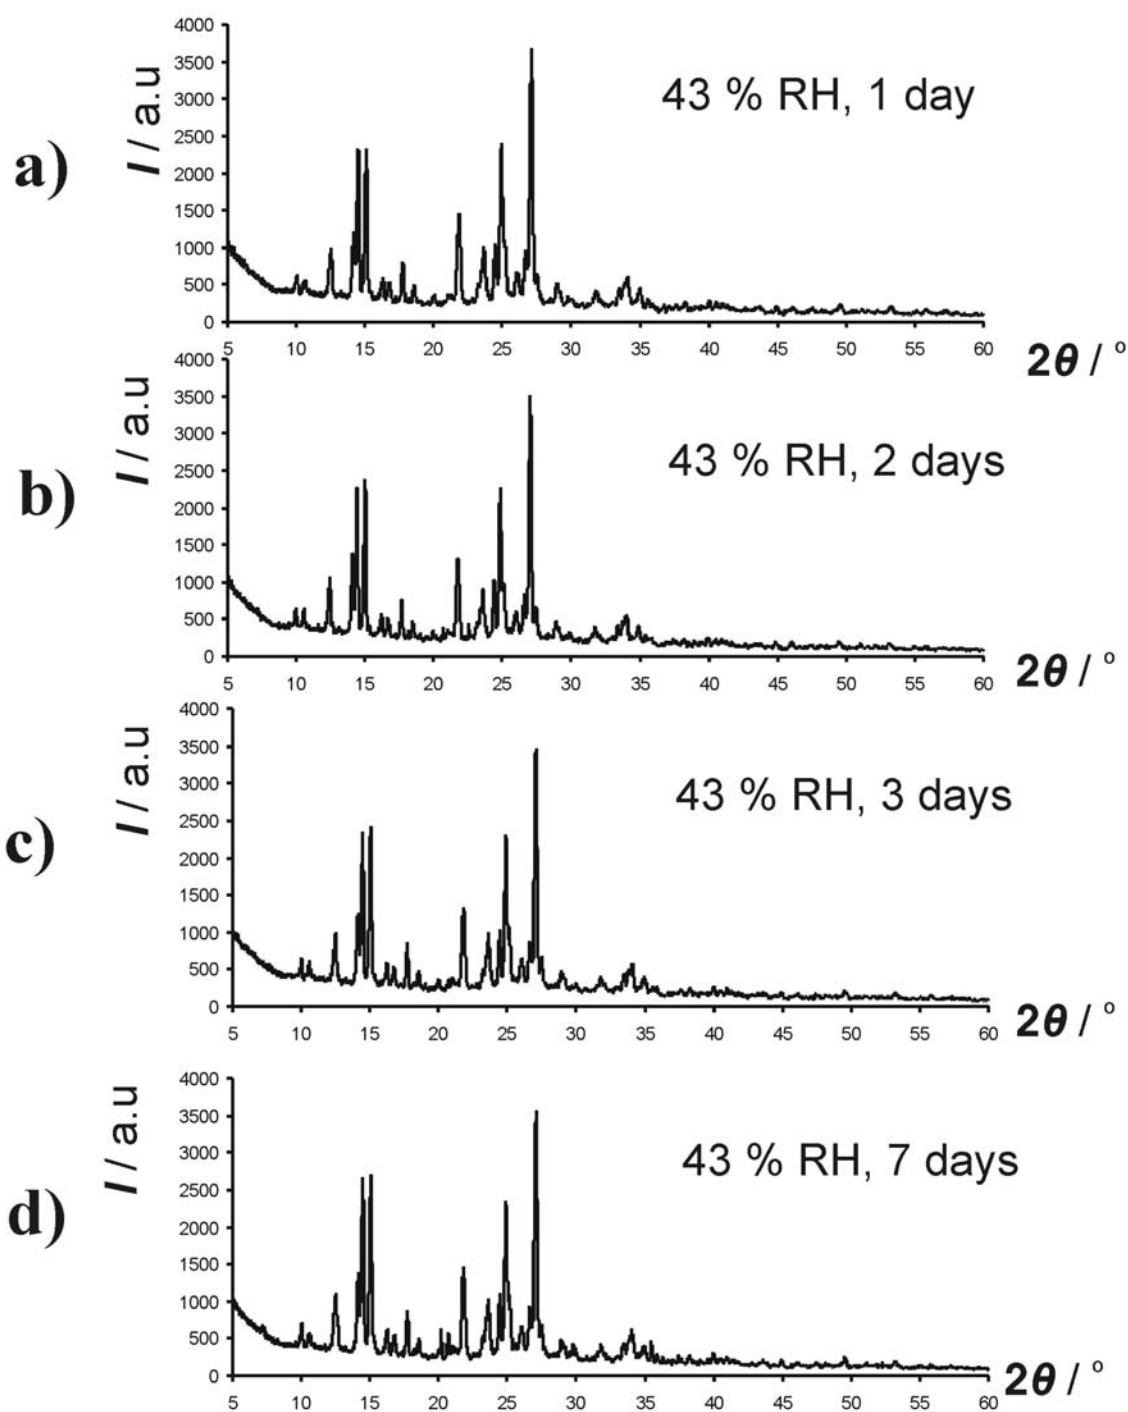

**Figure S23.** PXRD patterns for the cocrystal of  $(tp)_2(DL-ta)$  after exposure to 43% relative humidity for: a) 1 day; b) 2 days; c) 3 days and d) 7 days.

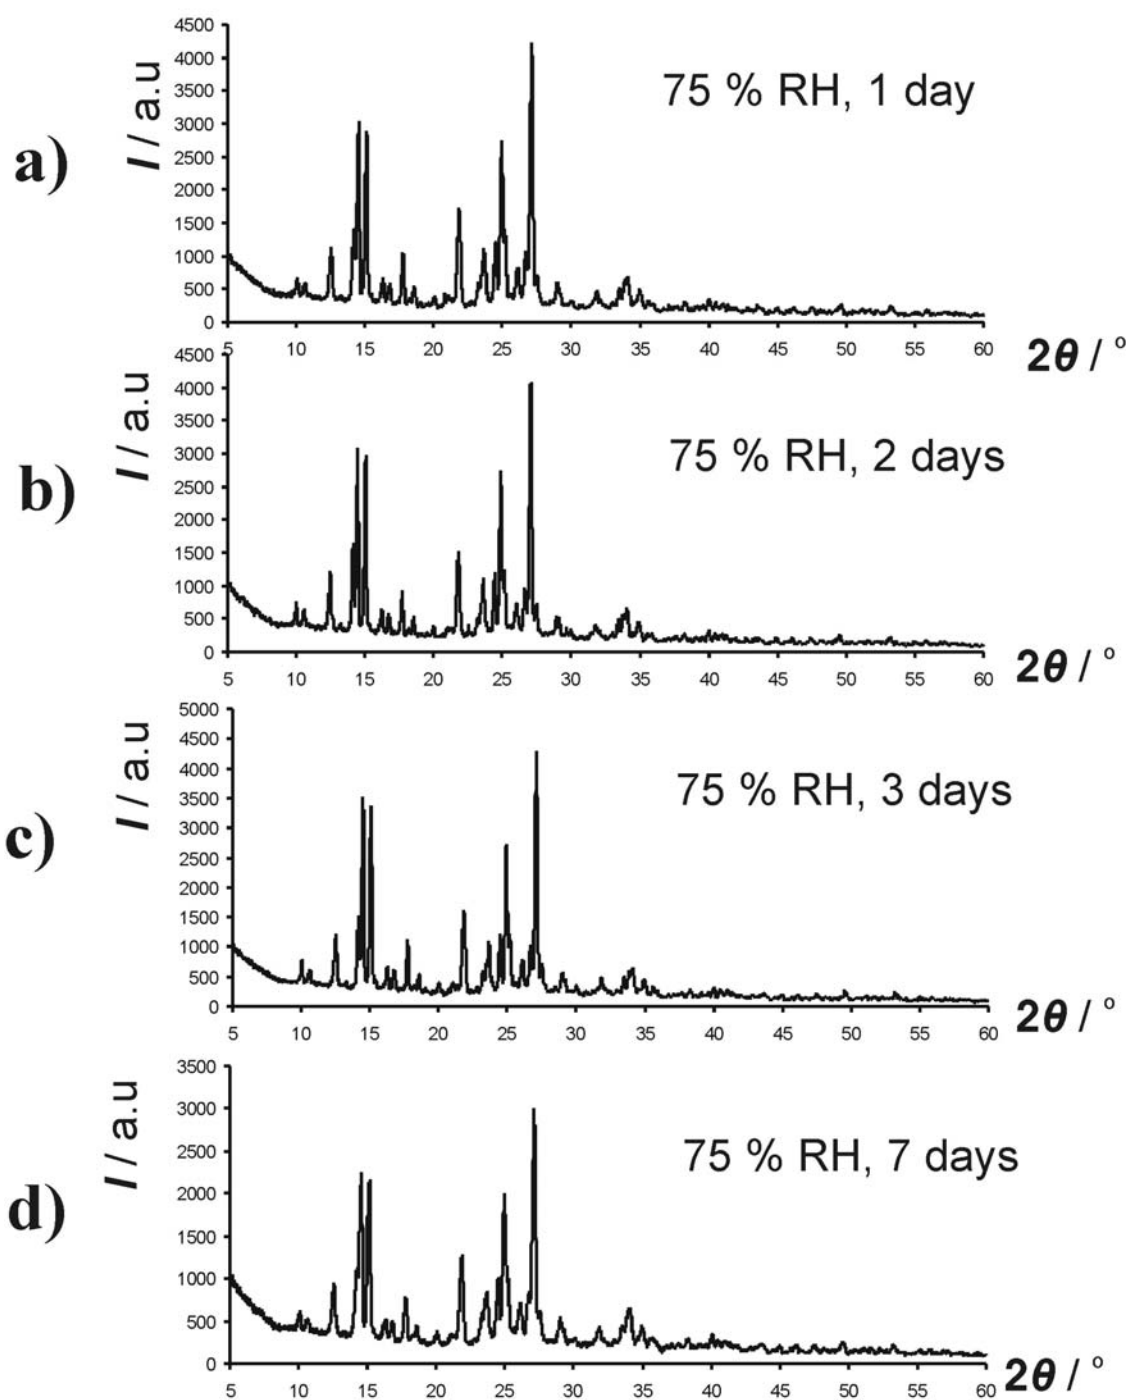

**Figure S24.** PXRD patterns for the cocrystal of  $(\text{tp})_2(\text{DL-ta})$  after exposure to 75% relative humidity for: a) 1 day; b) 2 days; c) 3 days and d) 7 days.

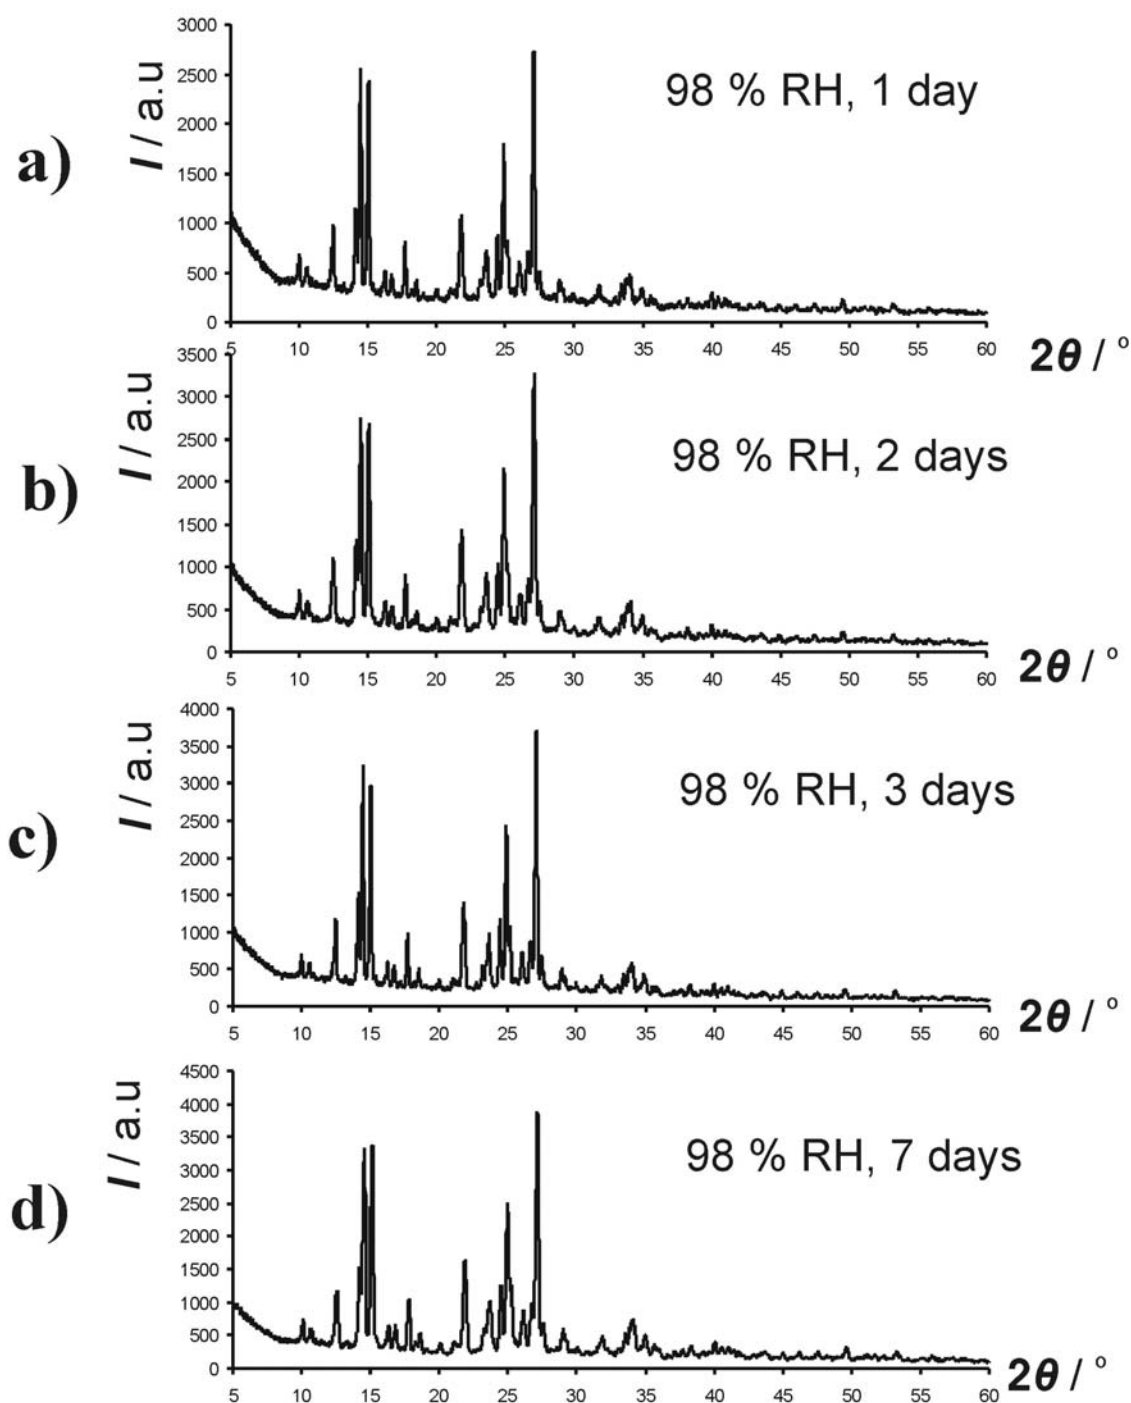

**Figure S25.** PXRD patterns for the cocrystal of  $(tp)_2(DL-ta)$  after exposure to 98% relative humidity for: a) 1 day; b) 2 days; c) 3 days and d) 7 days.

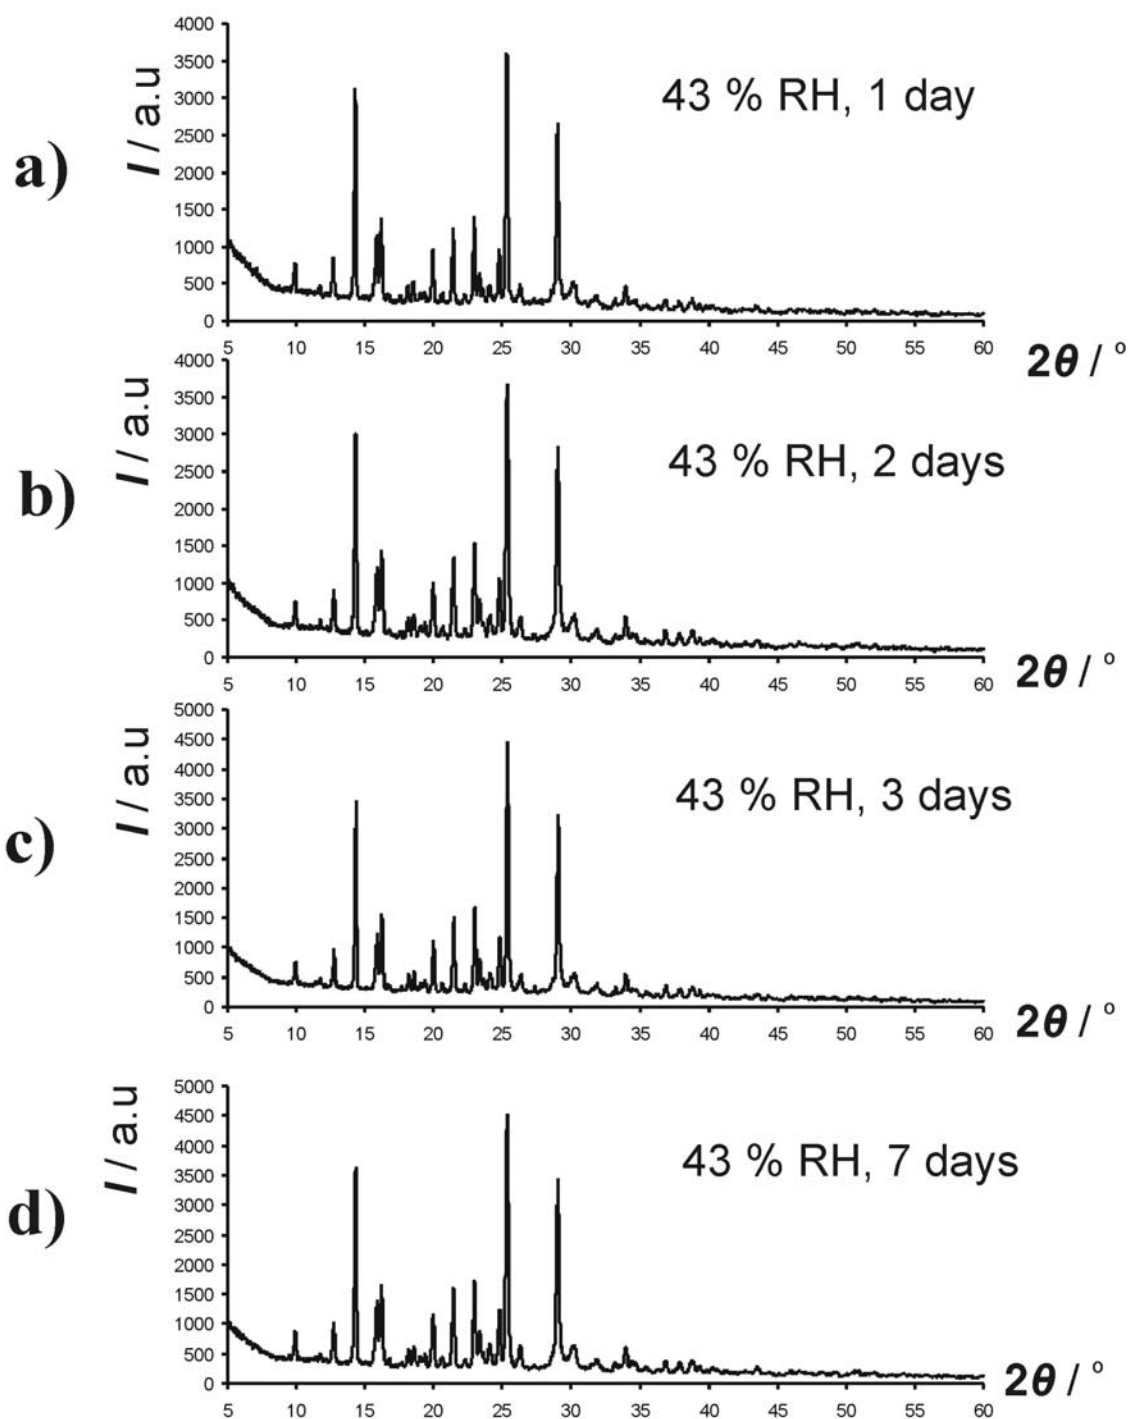

**Figure S26.** PXRD patterns for the cocrystal of (tp)(D-ma) after exposure to 43% relative humidity for: a) 1 day; b) 2 days; c) 3 days and d) 7 days.

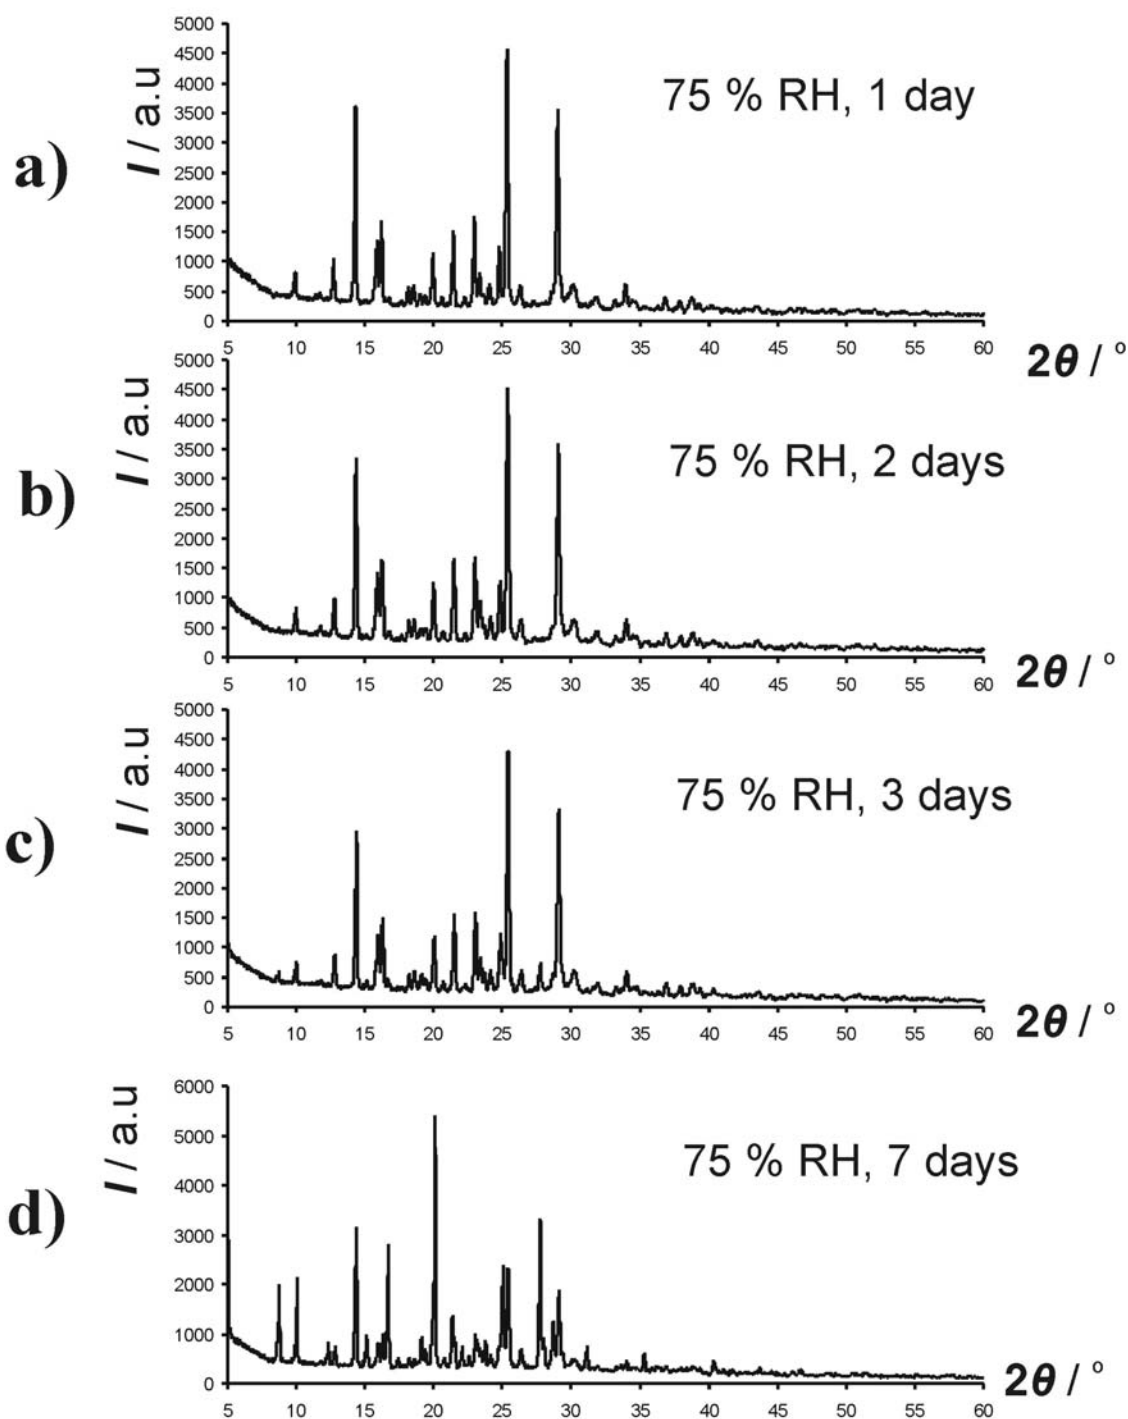

**Figure S27.** PXRD patterns for the cocrystal of (tp)(D-ma) after exposure to 75% relative humidity for: a) 1 day; b) 2 days; c) 3 days and d) 7 days.

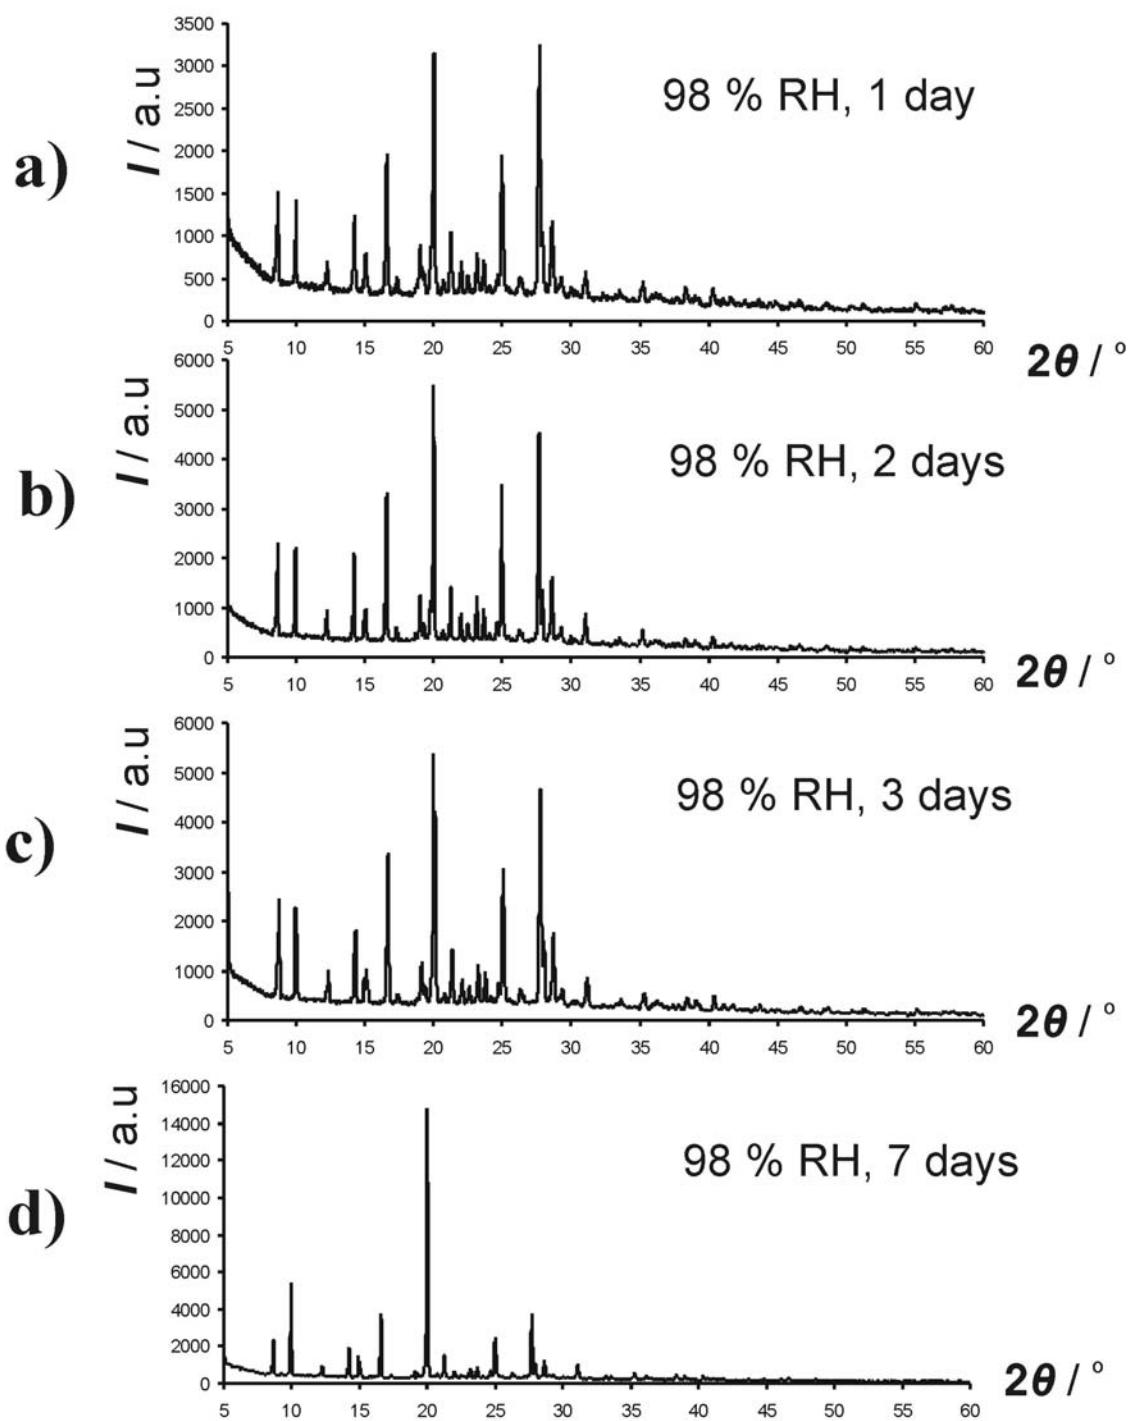

**Figure S28.** PXRD patterns for the cocrystal of  $(tp)(D-ma)$  after exposure to 98% relative humidity for: a) 1 day; b) 2 days; c) 3 days and d) 7 days.



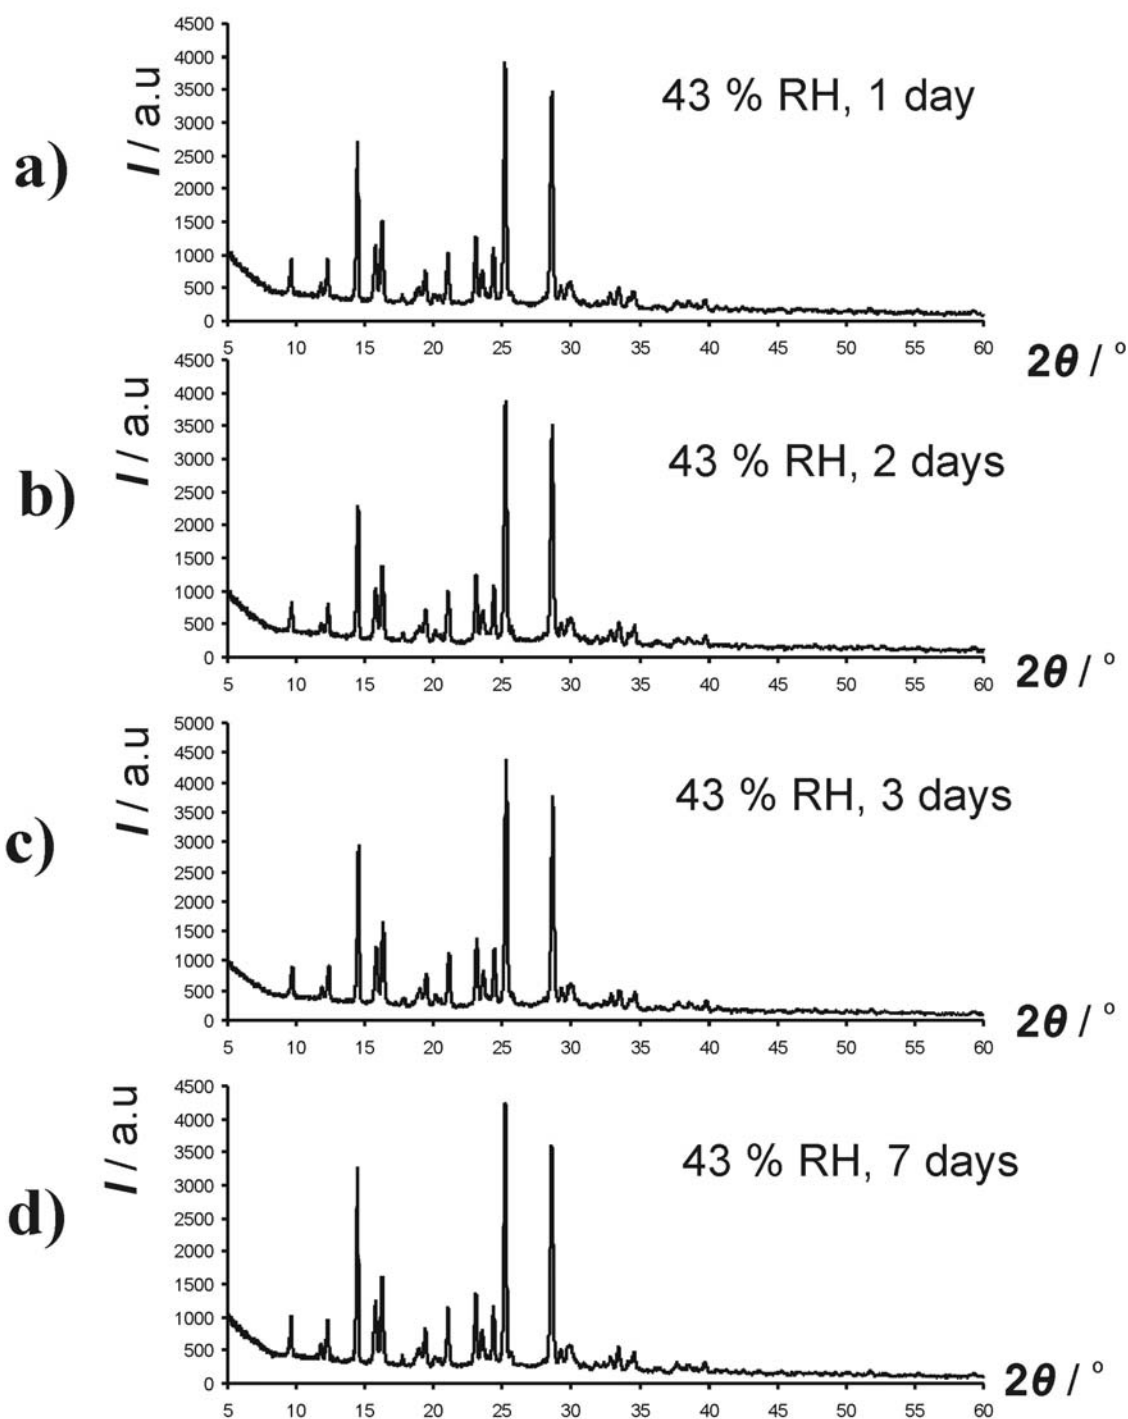

**Figure S29.** PXRD patterns for the cocrystal of (tp)(DL-ma) after exposure to 43% relative humidity for: a) 1 day; b) 2 days; c) 3 days and d) 7 days.

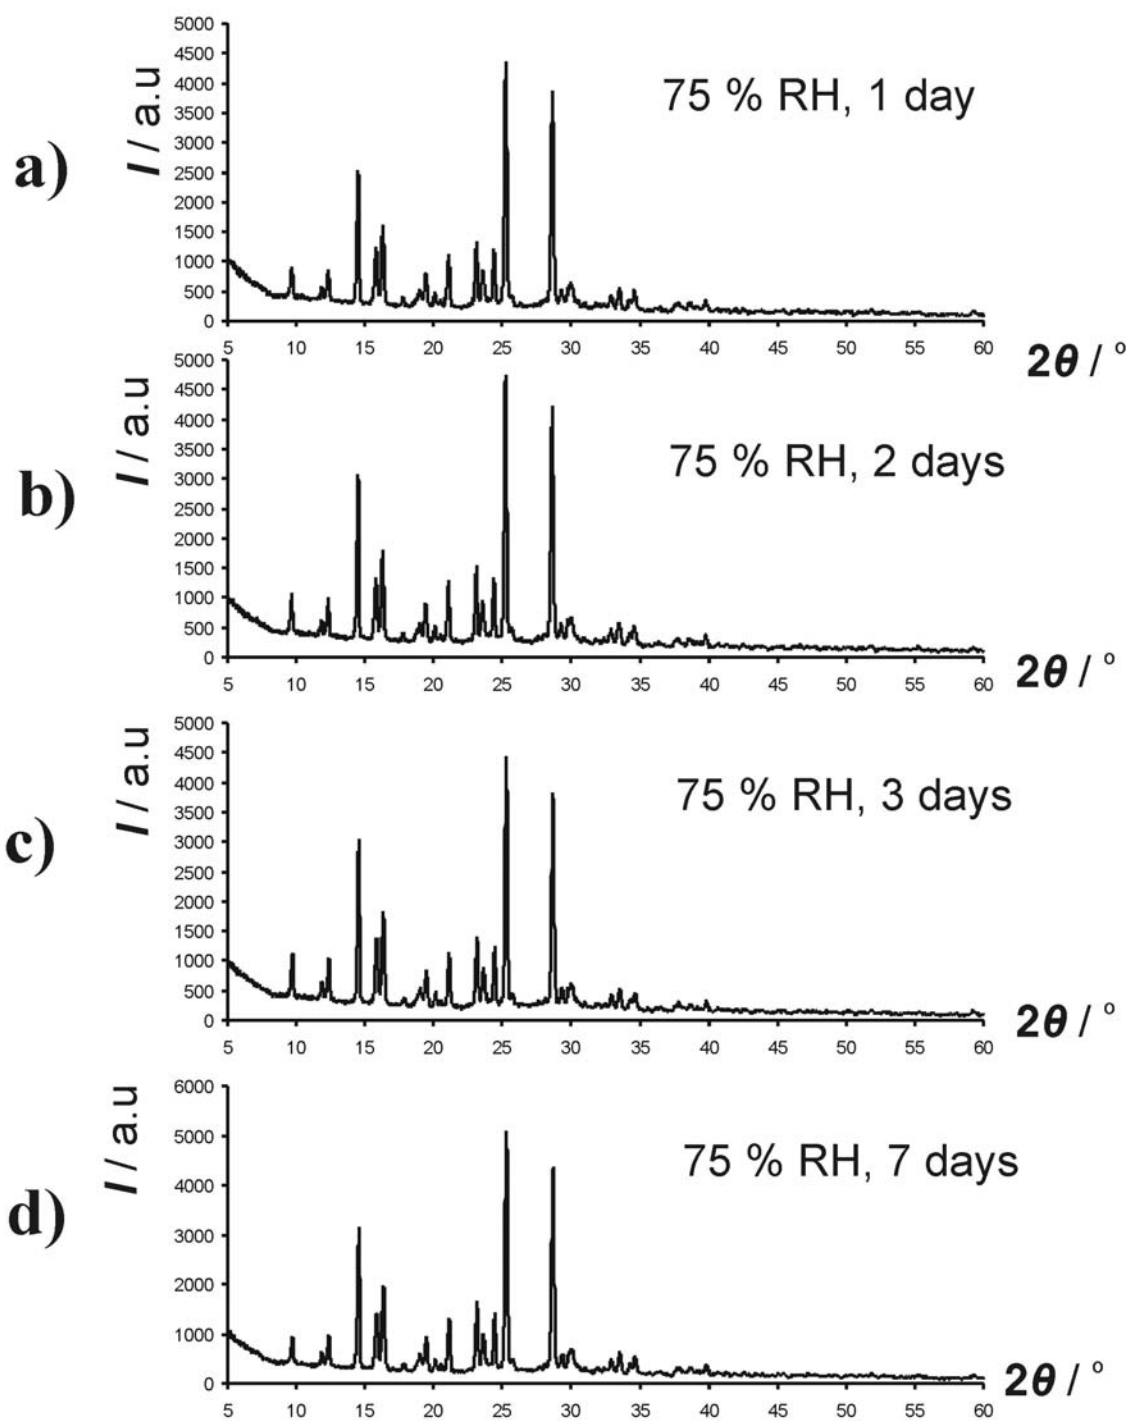

**Figure S30.** PXRD patterns for the cocrystal of (tp)(DL-ma) after exposure to 75% relative humidity for: a) 1 day; b) 2 days; c) 3 days and d) 7 days.

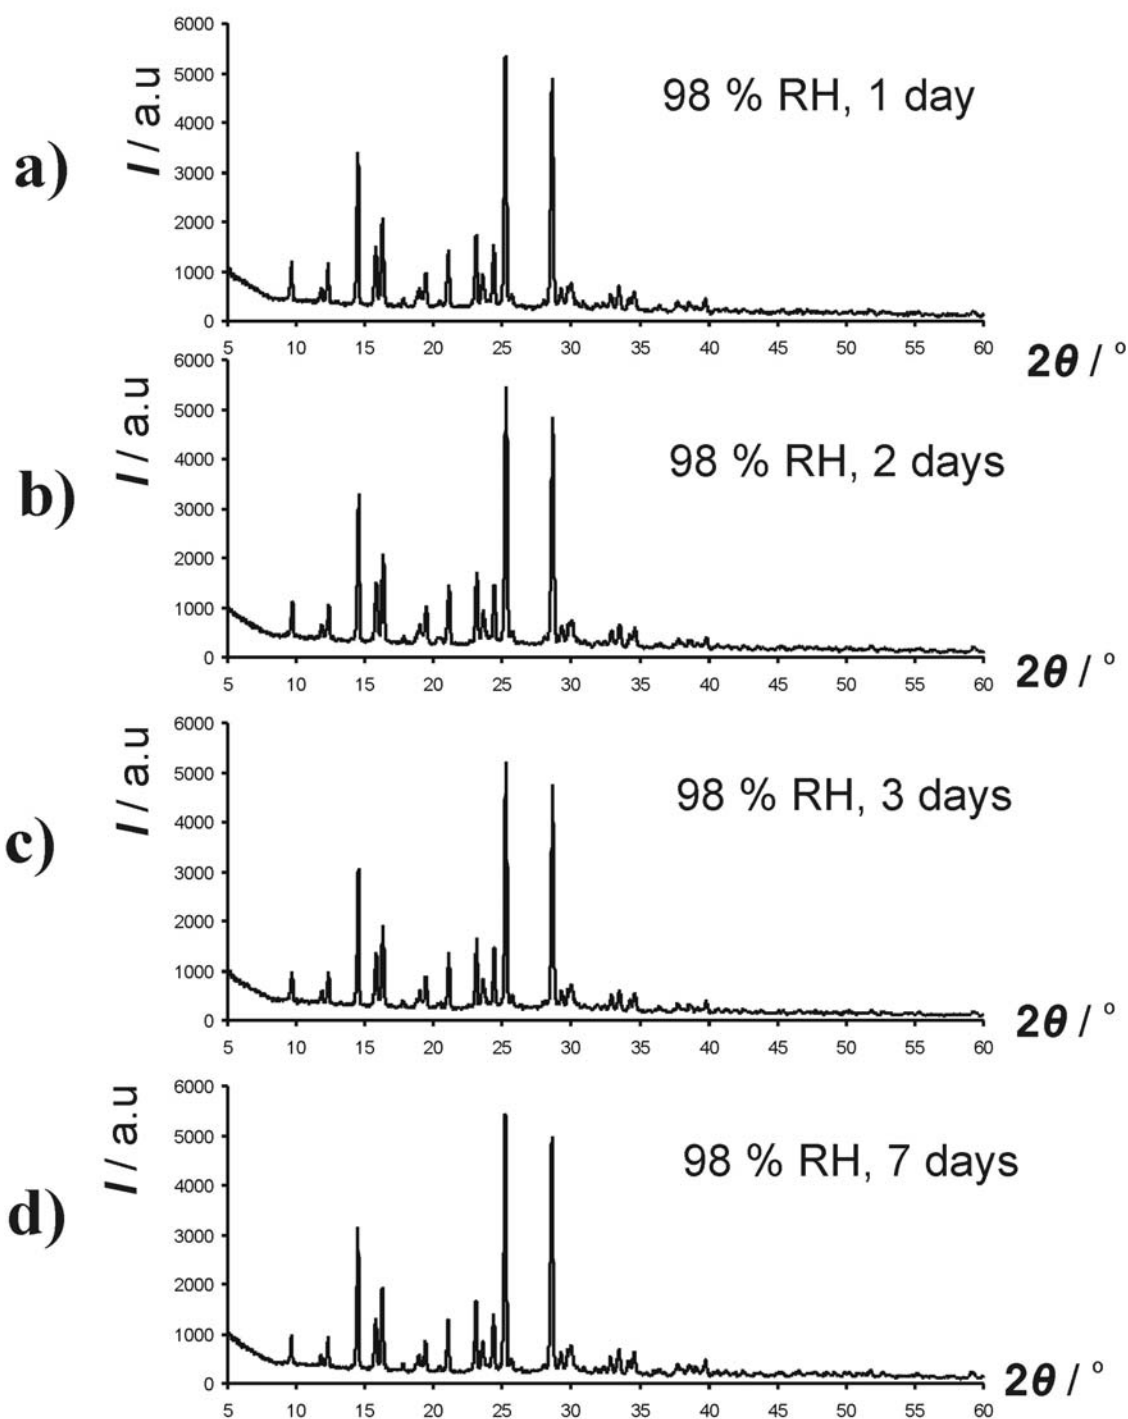

**Figure S31.** PXRD patterns for the cocrystal of (tp)(DL-ma) after exposure to 98% relative humidity for: a) 1 day; b) 2 days; c) 3 days and d) 7 days.

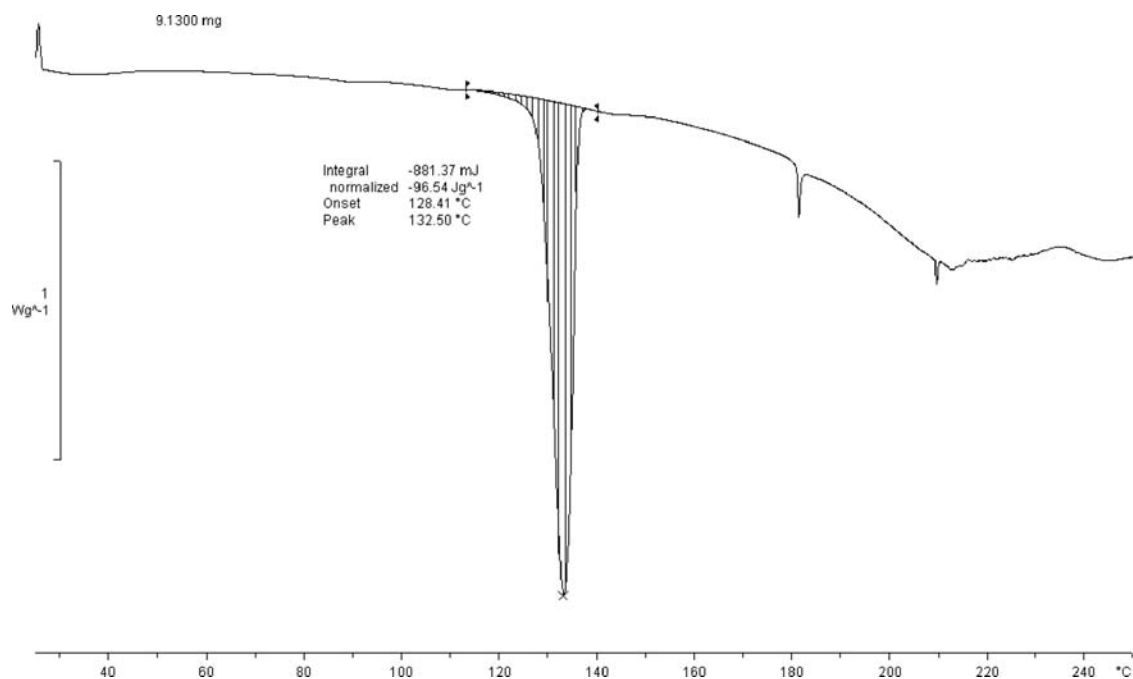

**Figure 32.** DSC thermogram for the (tp)(D-ma) cocrystal.

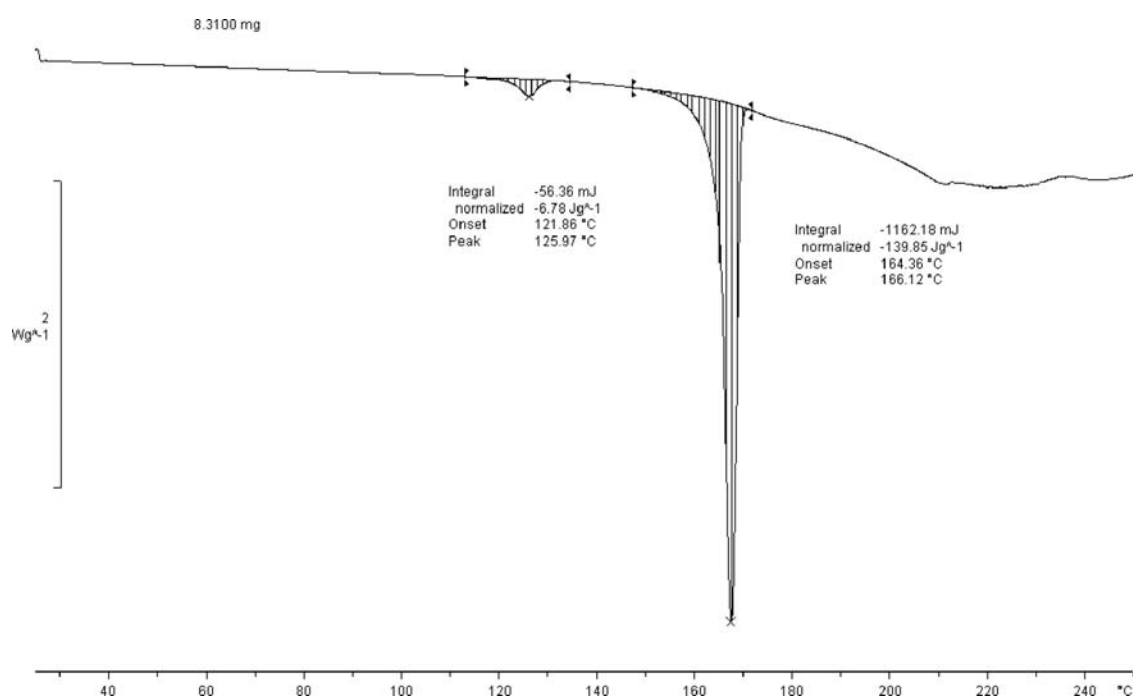

**Figure 33.** DSC thermogram for the (tp)(DL-ma) cocrystal.

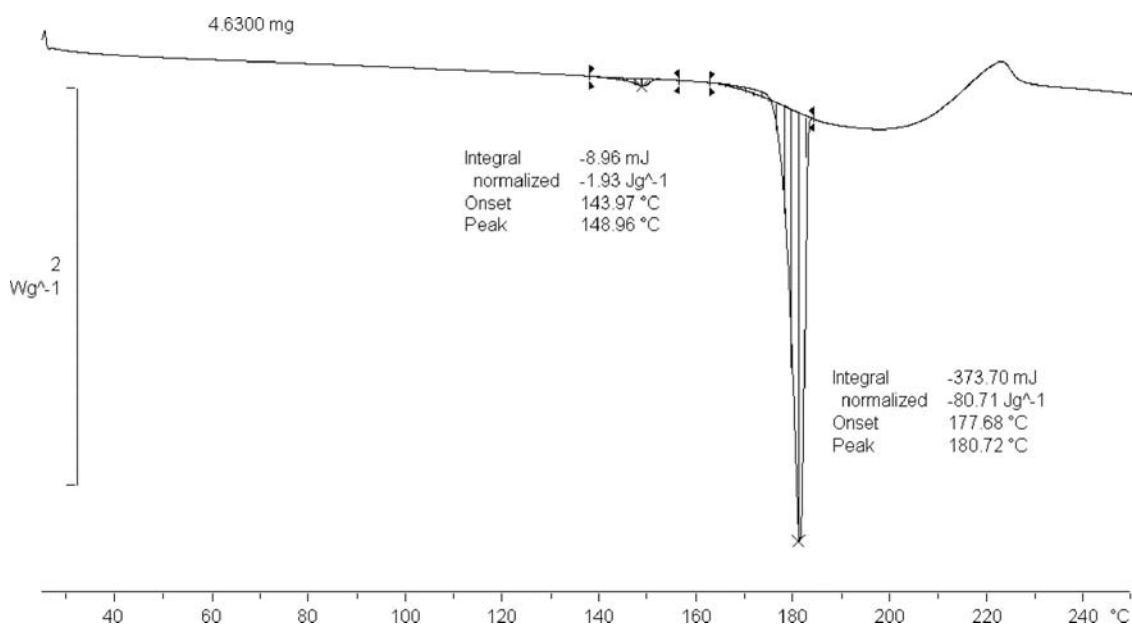

**Figure 34.** DSC thermogram for the  $(tp)_2(D-ta)$  cocrystal.

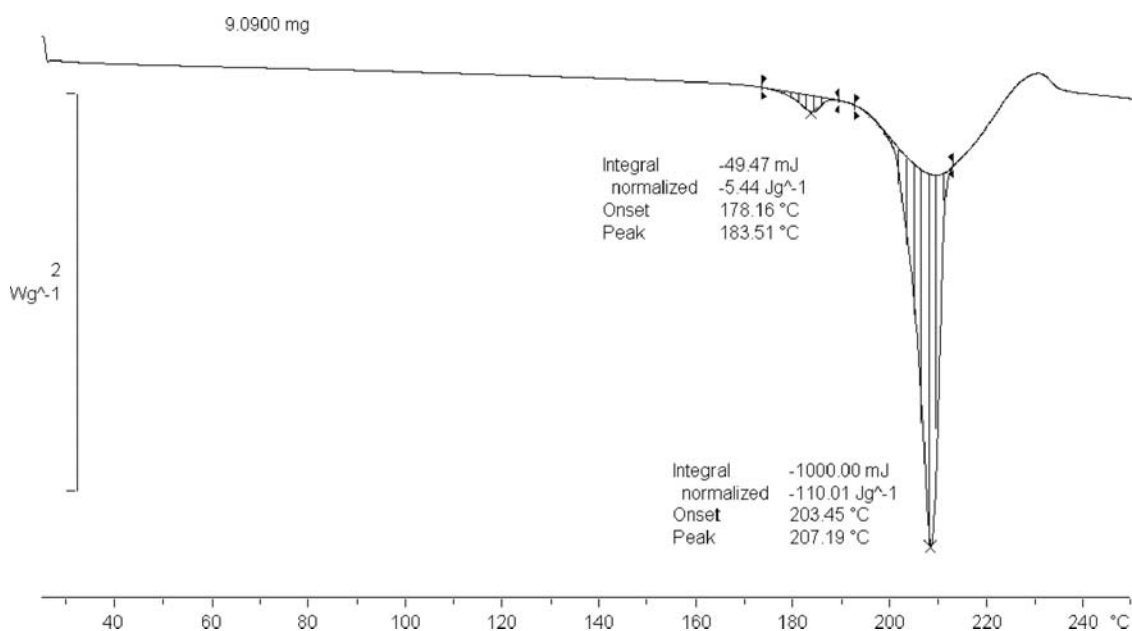

**Figure 35.** DSC thermogram for the  $(tp)_2(DL-ta)$  cocrystal.
